# Supplementary material for: Low-budget 3D-printed equipment for continuous flow reactions
Source: Beilstein J Org Chem. 2019 Feb 26;15:558–66. doi: 10.3762/bjoc.15.50 (PMC6404462; doi:10.3762/bjoc.15.50)
Supplement: File 1 — All details for the 3D-printed lab equipment and reactors (full part list, exploded-view CAD drawings, Arduino wiring) and all experimental data of the chemical reactions and NMR spectra. [file Beilstein_J_Org_Chem-15-558-s001.pdf]

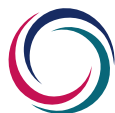

## Supporting Information

for

### Low-budget 3D-printed equipment for continuous flow reactions

Jochen M. Neumaier, Amiera Madani, Thomas Klein and Thomas Ziegler

*Beilstein J. Org. Chem.* **2019**, *15*, 558–566. doi:10.3762/bjoc.15.50

**All details for the 3D-printed lab equipment and reactors (full part list, exploded-view CAD drawings, Arduino wiring) and all experimental data of the chemical reactions and NMR spectra**

## Contents

|                               |     |
|-------------------------------|-----|
| Printer modifications .....   | S1  |
| 3D-printed lab equipment..... | S2  |
| General information .....     | S9  |
| Experimental .....            | S10 |
| NMR spectra .....             | S16 |
| References .....              | S30 |

## Printer modifications

The 3D Printer is an A8 from Anet, which has been modified to improve the print results and to allow a stable, safe and convenient operation. For safety reasons the power supply unit has been equipped with active ventilation (1), a power switch (2) and a fuse (3). Instead of the original heating cartridge, a custom-made device from HS Heizelemente has been installed (4). All 12 V and 230 V wires were upgraded with proper connections and the mainboard got two MOSFETs (hotbed and hotend) (5).

Components which helped to improve quality of the prints are for example self-printed  $x$ -,  $y$ - and  $z$ -axis stabilizers (6),  $x$ - and  $y$ -axis belt tensioners (7) (all downloaded from Thingiverse.com), a LJC18A3-H-Z/BX capacitive autolevel sensor (8) and a rubber mat under the printer (9).

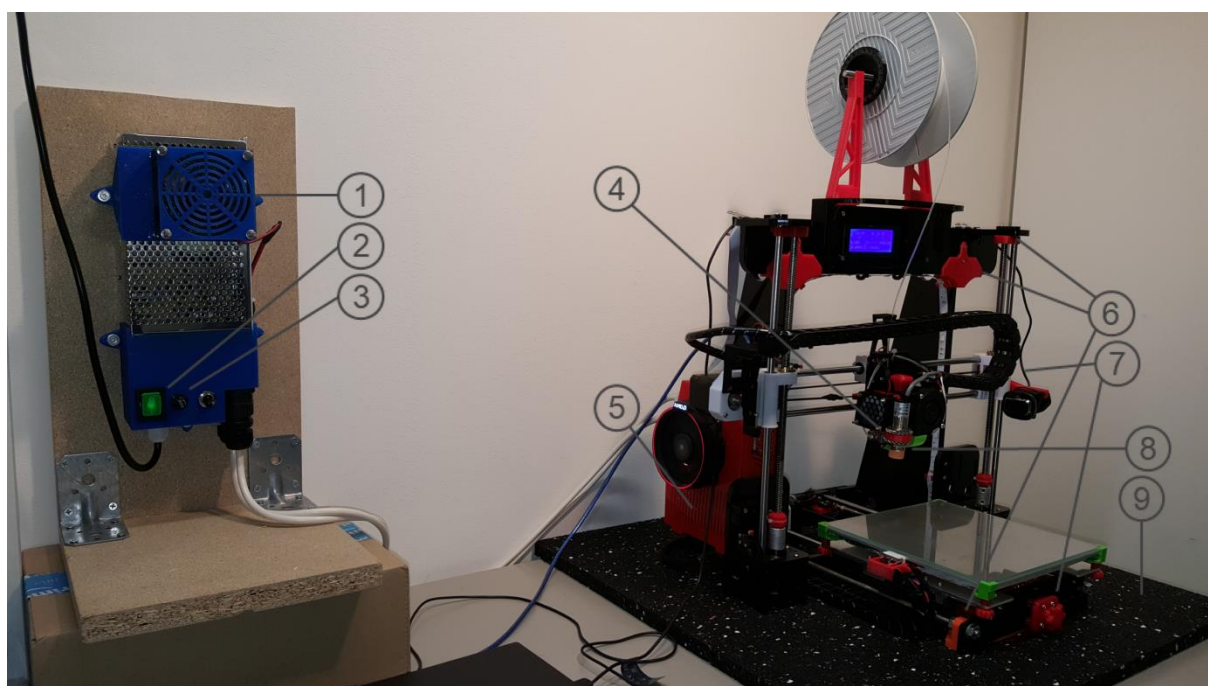

**Figure S1:** Custom modified 3D Printer Anet A8.

### 3D-printed lab equipment

**Software:** The lab equipment and flow reactors used in this work were designed with Autodesk Inventor Professional 2018. After modelling, the files were exported as stl files and sliced with the freeware program Cura 2.7.0 from Ultimaker.

**Flow reactors:** The reactors were printed with Verbatim PP filament 1.75 mm - Natural Transparent. The best results were obtained using the following settings:

Print speed = 30 mm/s

Filament flow = 105%

Nozzle temp. = 200 °C

Bed temperature = room temperature/no heating, printed on transparent PP packaging tape from Lyreco with a brim of 10 mm

Layer height: 0.1 mm – 0.15 mm (0.1 mm for channel diameter < 1 mm)

Wall thickness: 2.0 mm = 5 × nozzle diameter (0.4 mm)

Fan speed: 100% beginning at layer 3

**Syringe pump, 3D-printed parts:** The parts for the syringe pump were printed with polylactic acid (PLA) from Janbex. The best results for PLA were obtained using following settings:

Print speed = 60 mm/s

Filament flow = 100%

Nozzle temp. = 200 °C

Bed temperature = 60 °C, printed on a glass plate, coated with hairspray before each print.

Layer height: 0.2 mm – 0.3 mm

The STP and STL files of all printed parts can be found in the zip- file. Figure 2 shows the unassembled and assembled syringe pump as well as exploded-view CAD drawings of the pump and the controller. The part numbers can be found in Table 1.

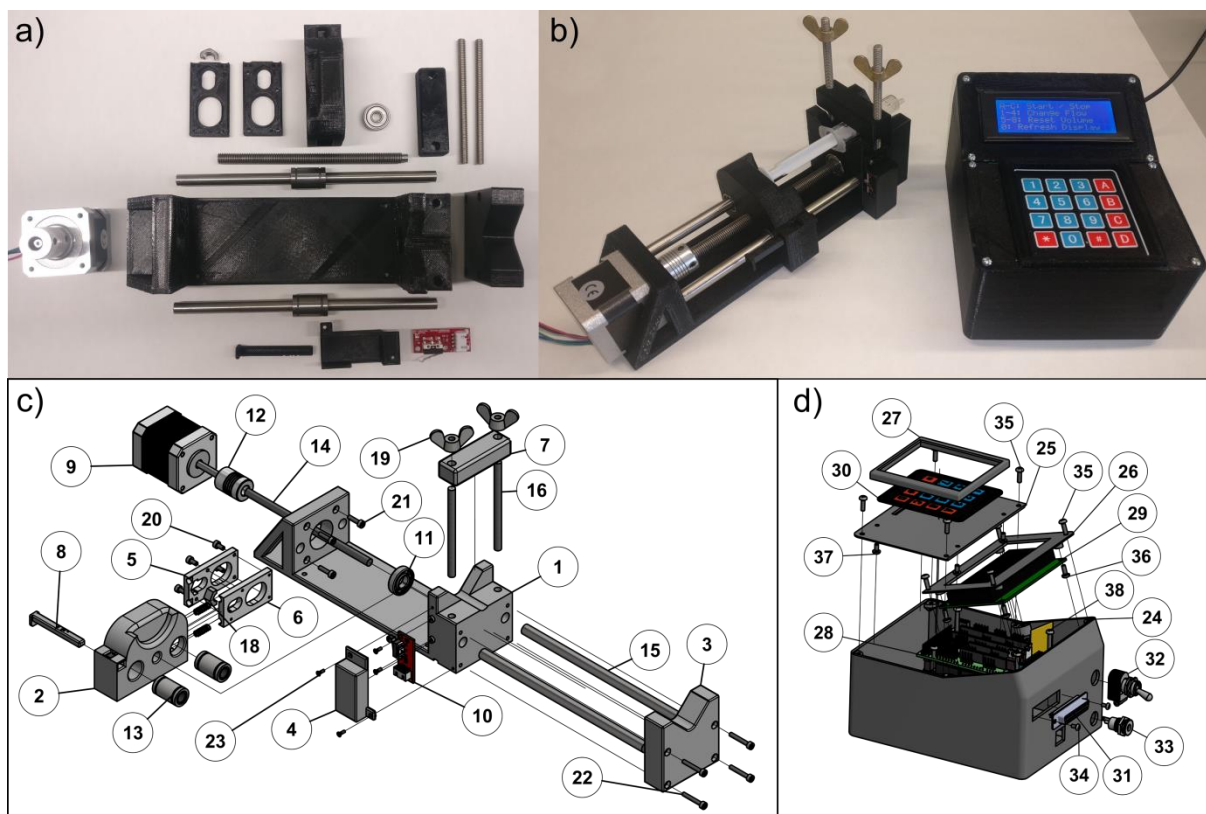

**Figure S2:** a) Unassembled parts used for one syringe pump. b) Assembled syringe pump and controller c) Exploded-view CAD drawings of the pump. d) The controller.

The “Adjustable end position” part (8) can be set to four positions for the six syringes used in our laboratory. Table 2 shows the right position for each syringe. If other syringes are used, their end-stop positions have to be set manually.

**Table S1:** Part list for a rack of four pumps with Arduino controller

| Quant. | Part                                                     | Purchased from    | No. |
|--------|----------------------------------------------------------|-------------------|-----|
|        | <b>For the pumps:</b>                                    |                   |     |
| 4      | Main body                                                | 3D-printed        | 1   |
| 4      | Movable component                                        | 3D-printed        | 2   |
| 4      | Pump ending                                              | 3D-printed        | 3   |
| 4      | Cap end stop                                             | 3D-printed        | 4   |
| 4      | Nut holder part 1                                        | 3D-printed        | 5   |
| 4      | Nut holder part 2                                        | 3D-printed        | 6   |
| 4      | Syringe holder                                           | 3D-printed        | 7   |
| 4      | Adjustable end position                                  | 3D-printed        | 8   |
| 1      | Motor case middle part                                   | 3D-printed        |     |
| 2      | Motor case outer part (2 times, mirrored)                | 3D-printed        |     |
| 4      | Pololu stepper motor NEMA 17, 200 bipolar steps          | Eckstein GmbH     | 9   |
| 4      | Mechanical limit switch end stop                         | Eckstein GmbH     | 10  |
| 4      | Ball bearing L626ZZ                                      | In-house workshop | 11  |
| 4      | 5 mm x 5 mm CNC stepper motor top narrow shaft couplings | Eckstein GmbH     | 12  |
| 4      | LM8UU linear bearings                                    | Eckstein GmbH     | 13  |
| 4      | Threaded rod, M8 × 135 mm                                | In-house workshop | 14  |
| 8      | Round rod, 180 × 8 mm                                    | In-house workshop | 15  |
| 8      | Threaded rod, M6 × 80 mm                                 | In-house workshop | 16  |
| 8      | Spring 10 mm, 5 mm diameter                              | In-house workshop | 17  |
| 4      | Screw nut, M8, half cutted                               | In-house workshop | 18  |
| 8      | Wing nut, M6                                             | In-house workshop | 19  |
| 16     | Cheese head screw with hexagon socket, M3 × 16 mm        | In-house workshop | 20  |
| 16     | Cheese head screw with hexagon socket, M3 × 12 mm        | In-house workshop | 21  |
| 16     | Cheese head screw with hexagon socket, M3 × 20 mm        | In-house workshop | 22  |
| 16     | Countersunk screws PH, M2 × 6 mm                         | In-house workshop | 23  |

| Quant. | Part                                                                         | Purchased from                    | No. |
|--------|------------------------------------------------------------------------------|-----------------------------------|-----|
| 1      | D-SUB plug, 25-pin                                                           | Reichelt elektronik GmbH & Co. KG |     |
| 1      | Aluminium plate 500×300 mm×3mm                                               | In-house workshop                 |     |
|        | Several different M3 screws and nuts for the fixation on the aluminium plate | In-house workshop                 |     |
|        | <b>For the Arduino case:</b>                                                 |                                   |     |
| 1      | Arduino case                                                                 | 3D-printed                        | 24  |
| 1      | Lower lid                                                                    | 3D-printed                        | 25  |
| 1      | Upper lid                                                                    | 3D-printed                        | 26  |
| 1      | Keypad cover                                                                 | 3D-printed                        | 27  |
| 1      | HIMALAYA basic MEGA 2560                                                     | Eckstein GmbH                     | 28  |
| 1      | Ramps 1.4 controller                                                         | Eckstein GmbH                     |     |
| 1      | Character 20x4 LCD display module                                            | Eckstein GmbH                     | 29  |
| 1      | 4 × 4 matrix array keypad 8 pin 16 key membrane keyboard for Arduino         | Eckstein GmbH                     | 30  |
| 1      | D-SUB socket, 25-pin                                                         | Reichelt elektronik GmbH & Co. KG | 31  |
| 1      | On-off switch, DC-socket                                                     | In-house workshop                 | 32  |
| 1      | DC-socket                                                                    | In-house workshop                 | 33  |
| 2      | Machine screws PH, M2,5 × 5                                                  | In-house workshop                 | 34  |
| 8      | Machine screws PH, M3 × 10                                                   | In-house workshop                 | 35  |
| 5      | Machine screws PH, M3 × 8                                                    | In-house workshop                 | 36  |
| 4      | Machine screws PH, M3 × 6                                                    | In-house workshop                 | 37  |
| 3      | Machine screws PH, M3 × 25                                                   | In-house workshop                 | 38  |
| 1      | D-SUB extension cable, 1:1, 25-pin                                           | Reichelt Elektronik GmbH & Co. KG |     |
| 1      | 12 V DC, 4 A power supply                                                    | In-house workshop                 |     |
| 4      | DRV8825 Stepper Motor Driver                                                 | Eckstein GmbH                     |     |
| 1      | 4-Pin 20cm Jumper Wire Cable Female to Female                                | Eckstein GmbH                     |     |
| 1      | Jumper Wire 10x1P female to female 20cm                                      | Eckstein GmbH                     |     |

**Wiring of the Arduino and pumps:** For the connection of the Arduino with the pumps and the end stop switch we used a RAMPS 1.4 controller, which was attached to the Arduino Mega 2560. The DRV8825 Stepper Motor Driver was clipped to the RAPMS controller at x, y, z and E0 (take care of the right direction!) without using any jumpers. The assignment of the stepper motors, end stop switches, display and keypad are shown in Figure 3. The RAMPS controller was connected to a standard 12 V DC, 4 A power supply. Be careful, not to connect the power supply and the USB of the Arduino at the same time!

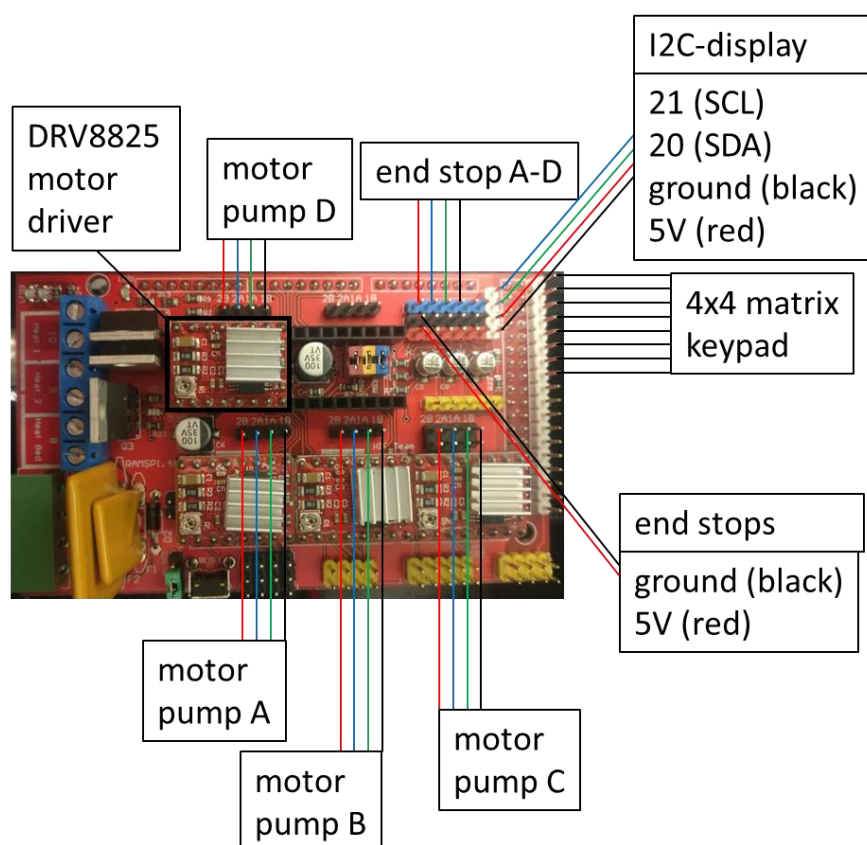

**Figure S3:** Wiring diagram of the syringe pump rack.

Figure S2d shows, how the Arduino and the RAMPS controller was mounted in the 3D-printed case. The connections from the controller were passed to a 25-pin D-Sub socket. Table S2 shows the pin assignment of the 25-pin socket to the RAMPS controller and the 25-pin plug to the pumps, which are connected through a D-SUB extension cable 1:1.

**Table S2:** Pin assignment of the 25-pin D-Sub connections.

| Pin | Pin socket on RAMPS | Pin plug connected to |
|-----|---------------------|-----------------------|
| 1   | 2B, X Driver        | Motor A, red          |
| 2   | 2A, X Driver        | Motor A, black        |
| 3   | 1A, X Driver        | Motor A, green        |
| 4   | 1B, X Driver        | Motor A, black        |
| 5   | 2B, Y Driver        | Motor B, red          |
| 6   | 2A, Y Driver        | Motor B, black        |
| 7   | 1A, Y Driver        | Motor B, green        |
| 8   | 1B, Y Driver        | Motor B, black        |
| 9   | 2B, Z Driver        | Motor C, red          |
| 10  | 2A, Z Driver        | Motor C, black        |
| 11  | 1A, Z Driver        | Motor C, green        |
| 12  | 1B, Z Driver        | Motor C, black        |
| 14  | 2B, E0 Driver       | Motor D, red          |
| 15  | 2A, E0 Driver       | Motor D, black        |
| 16  | 1A, E0 Driver       | Motor D, green        |
| 17  | 1B, E0 Driver       | Motor D, black        |
| 18  | 5V                  | Stop switches VCC     |
| 20  | GND                 | Stop switches GND     |
| 22  | X-                  | Stop switch A         |
| 23  | X+                  | Stop switch B         |
| 24  | Y-                  | Stop switch C         |
| 25  | Y+                  | Stop switch D         |

More information and datasheets for the Arduino and RAMPS controller can be found at <https://reprap.org/wiki>.

**Programming with Arduino software:** The software was written on the open-source Arduino software. If the motors and end stops are connected as mentioned above, the written software can be used instantly, otherwise the pins of the Arduino have to be edited to the corresponding pins. The syringes, for which the software was written, are shown in Table S3. First, the approximate mm/mL was measured for each syringe and put in line 40 (size of the syringes) and 41 (mm/mL of each syringe) of the code:

line 40: *int syringe[6] = {1, 2, 5, 10, 20, 50};*

line 41: *float syringefactor[6] = {57.3, 16.4, 8.38, 4.97, 3.12, 1.494};*

After the first accuracy test (see below) the syringefactors was corrected corresponding to the measured volumes:

line 41: *float syringefactor[6] = {58.310, 16.616, 8.459, 5.130, 3.200, 1.548};*

With this method different syringes can be insert in the code and a very accurate dispensing is achievable. The complete program code can be found in the zip-file (Supporting Information File 2).

**Brief instruction for using the syringe pump rack:** The keys A–D start and stop the pumps A–D. With the keys 1–4 you get to the syringe menu, where the size of the syringes can be change by pressing 1 or 7 (up and down). With the #-key you go to the flow rate entry, where flow rates can be set in ranges from 1–9999  $\mu\text{L}/\text{min}$ . By pressing the \*-key all entries in the syringe menu are saved and you return to the main menu. During change of the size and flow rate all pumps stop!

The display will not refresh automatically; you have to press the 0-key to refresh the display manually. After refresh, it shows the actual dispensed volume of each syringe. With the keys 5–8 you can reset the dispensed volume to 0 of the pumps A–D.

**Accuracy test of the syringe pump:** Each kind of syringe was tested with typical flow rates for continuous flow reactions. Distilled water was dispensed at room temperature for 4 min, weight and compared to the theoretical volume. In Table S3 you see the measured weight. With all syringes we never exceed  $\pm 1\%$  of deviation, which is comparable to commercial available syringe pumps.

**Table S3:** Accuracy test of the used syringes.

| Volume | Syringe                    | Flow rate<br>[ $\mu\text{L}/\text{min}$ ] | Weigth<br>[mg] | Deviation | End-stop<br>position |
|--------|----------------------------|-------------------------------------------|----------------|-----------|----------------------|
| 1 mL   | HSW NORM-JECT <sup>®</sup> | 50                                        | 200            | 0%        | 1 dot                |
| 2 mL   | BD Discardit II            | 100                                       | 401            | + 0.25%   | 2 dots               |
| 5 mL   | BD Discardit II            | 150                                       | 601            | + 0.17%   | 3 dots               |
| 10 mL  | HSW NORM-JECT <sup>®</sup> | 200                                       | 799            | – 0.125%  | 3 dots               |
| 20 mL  | BD Discardit II            | 500                                       | 2014           | + 0.7%    | 3 dots               |
| 50 mL  | HSW NORM-JECT <sup>®</sup> | 1000                                      | 4005           | + 0.125%  | 4 dots               |

## General information

For flow reactions the self-built syringe pump rack was used and, if necessary, additional syringe pumps LA-30 from Landgraf Laborsysteme HLL GmbH were used. Dry  $\text{CH}_2\text{Cl}_2$  and DMF were distilled from  $\text{P}_4\text{O}_{10}$ . Dry solvents were stored over molecular sieves under an atmosphere of nitrogen. For reaction monitoring TLC plates from Macherey-Nagel “Polygram Sil G/UV254” were used. For the mixing test solutions of Sudan Red G and Iron(II)phthalocyanine in DCM/Pyridine 99/1 were used. Preparative column chromatography was performed using a LaFlash system (VWR) and a flow rate of 20 mL/min with EasyVarioFlash cartridges from Götec-Labortechnik. Silica 60 (0.04–0.063 mm) from Macherey-Nagel was used, solvents used as eluents were of technical grade and distilled prior to their use. Petroleum ether (PE) refers to the fraction boiling at 60–90 °C. NMR spectra were recorded on a Bruker “Avance 400” spectrometer and calibrated to the residual solvent signal ( $\text{CDCl}_3$ :  $^1\text{H}$  7.27 ppm,  $^{13}\text{C}$  77.0 ppm). For peak assignment additional NMR spectra (DEPT-135,  $^1\text{H}$ ,  $^1\text{H}$ -COSY,  $^1\text{H}$ ,  $^{13}\text{C}$ -HMBC,  $^1\text{H}$ ,  $^{13}\text{C}$ -HSQC) were used, atoms are numbered according to the carbohydrate nomenclature.

## Experimental

### Flow synthesis of 2,3,4,6-tetra-*O*-acetyl- $\alpha$ -D-glucopyranosyl bromide (**2**)

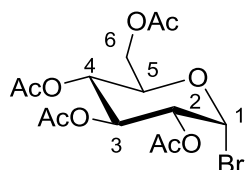

A solution of  $\beta$ -D-glucose pentaacetate (**1**, 1 M in dry  $\text{CH}_2\text{Cl}_2$ , 1 equiv, 107  $\mu\text{L}/\text{min}$ ) and a solution of HBr (33% in glacial acetic acid, 5 equiv, 93  $\mu\text{L}/\text{min}$ ) were mixed and pumped through flow reactor R3 with a total reactor volume of 1.5 mL at rt, resulting in a total flow rate of 200  $\mu\text{L}/\text{min}$  and a residence time of 7.5 min. The reaction was quenched by pumping water through a third inlet with a flow rate of 200  $\mu\text{L}/\text{min}$ . The biphasic mixture was passed through a CSTR ( $V = 1$  mL) with an in-printed stirring bar. The phases were separated under flow conditions in a 10 mL syringe and the organic phase was passed through a second syringe containing a  $\text{NaHCO}_3$ -solution for neutralization. Through an outlet in the cap, the excess water and formed  $\text{CO}_2$  was removed. The organic phase was collected, dried over  $\text{Na}_2\text{SO}_4$ , filtered and concentrated in vacuo. The yellowish residue was washed with a mixture of PE and EtOAc (1:1) to afford glucopyranosyl bromide **2** as a white solid with a yield of 86% based on the steady state.  $R_f = 0.71$  (PE:EtOAc, 1:1).

**$^1\text{H}$  NMR** (400 MHz,  $\text{CDCl}_3$ ):  $\delta$  6.61 (d,  $J_{1,2} = 4.0$  Hz, 1H, 1-H), 5.57 (app. t,  $J = 9.7$  Hz, 1H, 3-H), 5.17 (app. t,  $J = 10.3$  Hz, 1H, 4-H), 4.85 (dd,  $J_{2,3} = 10.0$  Hz,  $J_{1,2} = 4.0$  Hz, 1H, 2-H) 4.36 – 4.28 (m, 2H, 5-H, 6- $\text{H}_a$ ), 4.13 (d,  $J_{6b,6a} = 10.0$  Hz, 6- $\text{H}_b$ ), 2.11, 2.10, 2.06, 2.04 (4 s, 12 H, 4  $\times$   $\text{COCH}_3$ ) ppm.

**$^{13}\text{C}$  NMR** (100 MHz,  $\text{CDCl}_3$ ):  $\delta$  170.5, 169.8, 169.8, 169.4 (4  $\times$   $\text{COCH}_3$ ), 86.5 (C1), 72.1 (C5), 70.6 (C2), 70.1 (C3), 67.1 (C4), 60.9 (C6), 20.6, 20.6, 20.6, 20.5 (4  $\times$   $\text{COCH}_3$ ) ppm. Spectroscopic data are in agreement with reported literature.<sup>[1]</sup>

## Flow synthesis of methyl 2,3,4,6-tetra-*O*-acetyl- $\beta$ -D-glucopyranoside (**3**) via Koenigs-Knorr glycosylation

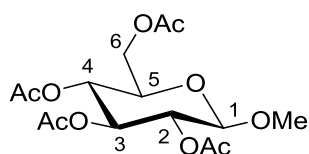

A solution of 2,3,4,6-tetra-*O*-acetyl- $\alpha$ -D-glucopyranosyl bromide (**2**, 0.25 M in dry  $\text{CH}_2\text{Cl}_2$ , 1 equiv, 4.67 g, 166  $\mu\text{L}/\text{min}$ ) and MeOH (HPLC grade, 20 equiv, 34  $\mu\text{L}/\text{min}$ ) were mixed and pumped through a CSTR with a total reactor volume of 1.0 mL followed by a packed-bed column equipped with a mixture of AgOTf (5.83 g, 2 equiv) and molecular sieves (4 Å). The total flow rate was 200  $\mu\text{L}/\text{min}$  and the residence time was 5 min. The reaction mixture was collected in a glass vial containing sat.  $\text{NaHCO}_3$  solution. The phases were separated and the organic phase was dried over  $\text{Na}_2\text{SO}_4$ , filtered and concentrated in vacuo. Flash column chromatography (PE/EtOAc, 4:1) afforded methyl glycoside **3** (1.81 g) as yellowish oil with a yield of 44%.  $R_f$  = 0.49 (PE:EtOAc 1:1).

**$^1\text{H}$  NMR** (400 MHz,  $\text{CDCl}_3$ ):  $\delta$  5.20 (app. t,  $J$  = 9.5 Hz, 1H, 3-H), 5.09 (app. t,  $J$  = 9.7 Hz, 1H, 4-H), 4.98 (dd,  $J_{2,1}$  = 7.9 Hz,  $J_{2,3}$  = 9.5 Hz, 1H, 2-H), 4.43 (d,  $J_{1,2}$  = 7.9 Hz, 1H, 1-H), 4.27 (dd,  $J_{6a,6b}$  = 12.3 Hz,  $J_{6a,5}$  = 4.6 Hz, 1H, 6- $\text{H}_a$ ), 4.14 (dd,  $J_{6b,6a}$  = 12.3 Hz,  $J_{6b,5}$  = 2.3 Hz, 1H, 6- $\text{H}_b$ ), 3.70 (ddd,  $J_{5,4}$  = 9.9 Hz,  $J_{5,6a}$  = 4.5 Hz,  $J_{5,6b}$  = 2.3 Hz, 1H, 5-H), 3.50 (s, 3H,  $\text{OCH}_3$ ), 2.08, 2.04, 2.02, 1.99 (4 s, 12H, 4  $\times$   $\text{COCH}_3$ ) ppm.

**$^{13}\text{C}$  NMR** (100 MHz,  $\text{CDCl}_3$ ):  $\delta$  170.6, 170.2, 169.4, 169.4 (4  $\times$   $\text{OCOCH}_3$ ), 101.6 (C-1), 72.8 (C-2), 71.7 (C-3), 71.2 (C-4), 68.4 (C-5), 61.9 (C-6), 57.0 ( $\text{OCH}_3$ ), 20.7, 20.6, 20.5, 20.5 (4  $\times$   $\text{COCH}_3$ ) ppm.

Spectroscopic data are in agreement with reported literature.<sup>[2]</sup>

## Batch synthesis of 2,3,4,6-tetra-*O*-acetyl-D-glucopyranose (**4**)

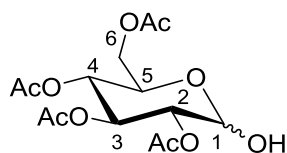

A solution of  $\beta$ -D-glucose pentaacetate (**1**, 1.95 g, 5 mmol) and hydrazine acetate (0.55 g, 6 mmol) in dry DMF (5 mL) was stirred for 45 min at 50 °C. Afterwards, the reaction mixture was diluted with ethyl acetate (5 mL) and washed with water (3  $\times$  10 mL) and brine (10 mL). The organic phase was dried over  $\text{Na}_2\text{SO}_4$  and concentrated in vacuo. Coevaporation with

*n*-heptane afforded title compound **4** (1.69 g, 97%, 72:28  $\alpha$ : $\beta$  anomeric ratio) as a colourless foam.  $R_f = 0.54$  (PE:EtOAc, 1:1).

**$^1\text{H}$  NMR** (400 MHz,  $\text{CDCl}_3$ ):  $\delta$  5.53 (app. t, 1H,  $J = 9.9$  Hz, 3- $\text{H}_\alpha$ ), 5.44 (d, 1H,  $J_{1,2} = 3.5$  Hz, 1- $\text{H}_\alpha$ ), 5.23 (app. t, 1H,  $J = 9.6$  Hz, 3- $\text{H}_\beta$ ), 5.11–5.05 (m, 2H,  $J = 9.6$  Hz, 4- $\text{H}_{\alpha/\beta}$ ), 4.90–4.85 (m, 2H, 2- $\text{H}_{\alpha/\beta}$ ), 4.73 (d, 1H,  $J_{1,2} = 8.1$  Hz, 1- $\text{H}_\beta$ ), 4.29–4.21 (m, 3H, 5- $\text{H}_\alpha$ , 6a- $\text{H}_{\alpha/\beta}$ ), 4.17–4.11 (m, 2H, 6b- $\text{H}_{\alpha/\beta}$ ), 3.76 (ddd, 1H,  $J_{5,4} = 10.1$  Hz,  $J_{5,6a} = 4.8$  Hz,  $J_{5,6b} = 2.5$  Hz, 5- $\text{H}_\beta$ ), 2.09, 2.08, 2.08, 2.03, 2.03, 2.01 (12H,  $\text{COCH}_3$ ) ppm.

**$^{13}\text{C}$  NMR** (100 MHz,  $\text{CDCl}_3$ ):  $\delta$  170.8, 170.8, 170.2, 170.1, 169.6, 169.53, ( $\text{CO-CH}_3$ ), 95.5 ( $\text{C-1}_\beta$ ), 90.1 ( $\text{C-1}_\alpha$ ), 73.2 ( $\text{C-3}_\beta$ ), 72.2 ( $\text{C-5}_\beta$ ), 72.0 ( $\text{C-2}_\beta$ ), 71.1 ( $\text{C-2}_\alpha$ ), 69.9 ( $\text{C-3}_\alpha$ ), 68.5, 68.4 ( $\text{C-4}_{\alpha/\beta}$ ), 67.1 ( $\text{C-5}_\alpha$ ), 61.9, ( $\text{C-6}_{\alpha/\beta}$ ), 20.7, 20.7, 20.7, 20.6, 20.5, ( $\text{COCH}_3$ ) ppm.

Spectroscopic data are in agreement with reported literature.<sup>[3]</sup>

### Flow synthesis of 2,3,4,6-tetra-*O*-acetyl- $\alpha$ -D-glucopyranosyl trichloroacetimidate (**5**)

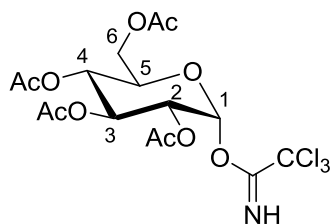

A solution of 2,3,4,6-tetra-*O*-acetyl- $\beta$ -D-glucopyranose (**4**, 0.1 M in dry  $\text{CH}_2\text{Cl}_2$ , 1 equiv,  $\mu\text{L}/\text{min}$ ), a solution of trichloroacetonitrile (1 M in dry  $\text{CH}_2\text{Cl}_2$ , 10 eq,  $\mu\text{L}/\text{min}$ ) and a solution of DBU (0.1 M in dry  $\text{CH}_2\text{Cl}_2$ , 0.3 eq,  $\mu\text{L}/\text{min}$ ) were mixed and pumped through flow reactor R1 with a total reactor volume of 1.05 mL at 0 °C, resulting in a total flow rate of 300  $\mu\text{L}/\text{min}$  and a residence time of 3.5 min. The reaction mixture was collected in a glass vial containing sat.  $\text{NaHCO}_3$  solution. The phases were separated and the organic phase was dried over  $\text{Na}_2\text{SO}_4$ , filtered and concentrated in vacuo. Flash column chromatography (PE/EtOAc, 9:1 + 2%  $\text{NEt}_3$ ) afforded glucopyranosyl imidate **5** as a yellowish oil in a yield of 67% based on the steady state.  $R_f = 0.65$  (PE/EtOAc, 1:1).

**$^1\text{H}$  NMR** (400 MHz,  $\text{CDCl}_3$ ):  $\delta$  8.70 (s, 1H, NH), 6.56 (d,  $J_{1,2} = 3.7$  Hz, 1H, 1-H), 5.57 (app. t,  $J_{2,3} = 9.9$  Hz, 1H, 3-H), 5.18 (app. t,  $J = 9.6$  Hz, 1H, 4-H), 5.13 (dd,  $J_{2,3} = 10.1$  Hz,  $J_{2,1} = 3.6$  Hz, 1H, 2-H), 4.28 (dd,  $J_{6a,6b} = 12.2$  Hz,  $J_{6a,5} = 4.0$  Hz, 1H, 6- $\text{H}_a$ ), 4.22 (ddd,  $J_{5,4} = 10.2$  Hz,  $J_{5,6a} = 4.1$  Hz,  $J_{5,6b} = 1.9$  Hz, 1H, 5-H), 4.13 (dd,  $J_{6b,6a} = 12.3$  Hz,  $J_{6b,5} = 2.0$  Hz, 1H, 6- $\text{H}_b$ ), 2.08, 2.05, 2.04, 2.02 (4 s, 12H, 4  $\times$   $\text{COCH}_3$ ) ppm.

**$^{13}\text{C}$  NMR** (100 MHz,  $\text{CDCl}_3$ ):  $\delta$  170.5, 170.0, 169.8, 169.5 ( $4 \times \text{COCH}_3$ ), 160.8 ( $\text{CNH-CCl}_3$ ), 92.9 (C-1), 90.7 ( $\text{CCl}_3$ ), 70.0 (C-5), 69.8 (C-3), 69.7 (C-2), 67.8 (C-4), 61.3 (C-6), 20.6, 20.6, 20.6, 20.4 ( $4 \times \text{COCH}_3$ ) ppm.

Spectroscopic data are in agreement with reported literature.<sup>[4]</sup>

### Multistep synthesis of methyl 2,3,4,6-tetra-*O*-acetyl- $\beta$ -D-glucopyranoside (**3**)

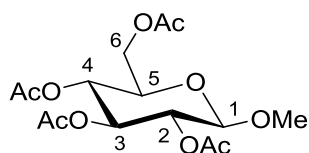

A solution of 2,3,4,6-tetra-*O*-acetyl-D-glucopyranose (**4**, 0.1 M in dry  $\text{CH}_2\text{Cl}_2$ , 1 equiv, 67  $\mu\text{L}/\text{min}$ ), a solution of trichloroacetonitrile (1 M in dry  $\text{CH}_2\text{Cl}_2$ , 10 equiv, 67  $\mu\text{L}/\text{min}$ ) and a solution of DBU (0.1 M in dry  $\text{CH}_2\text{Cl}_2$ , 0.2 equiv, 13  $\mu\text{L}/\text{min}$ ) were mixed and pumped at rt through the first flow reactor R1 with a total reactor volume of 1.05 mL. The resulting reaction mixture was pumped at 0 °C together with a solution of TMSOTf (0.01 M in  $\text{CH}_2\text{Cl}_2$ , 0.3 equiv, 20  $\mu\text{L}/\text{min}$ ) and a solution of methanol (0.1 M in  $\text{CH}_2\text{Cl}_2$ , 20 equiv, 133  $\mu\text{L}/\text{min}$ ) through the second flow reactor R1 resulting in a total flow rate of 300  $\mu\text{L}/\text{min}$  and a residence time of 3.5 min. The reaction mixture was collected in a glass vial containing a sat.  $\text{NaHCO}_3$  solution. The phases were separated and the organic phase was dried over  $\text{Na}_2\text{SO}_4$ , filtered and concentrated in vacuo. Flash column chromatography (PE/EtOAc 3:1) afforded methyl glycoside **3** as a yellowish oil in a yield of 58% based on the steady state  $R_f = 0.46$  (PE/EtOAc 1:1).

The NMR data are shown above.

### Multistep synthesis of propargyl 2,3,4,6-tetra-*O*-acetyl- $\beta$ -D-glucopyranoside (**6**)

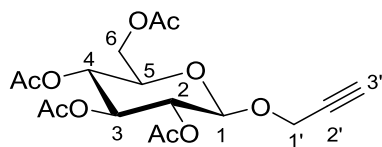

A solution of 2,3,4,6-tetra-*O*-acetyl- $\beta$ -D-glucopyranoside (**4**, 0.1 M in dry  $\text{CH}_2\text{Cl}_2$ , 1 equiv, 56  $\mu\text{L}/\text{min}$ ), a solution of trichloroacetonitrile (1 M in dry  $\text{CH}_2\text{Cl}_2$ , 10 equiv, 56  $\mu\text{L}/\text{min}$ ) and a solution of DBU (0.1 M in dry  $\text{CH}_2\text{Cl}_2$ , 0.5 equiv, 28  $\mu\text{L}/\text{min}$ ) were mixed and pumped at rt through the first flow reactor R1 with a total reactor volume of 1.05 mL. The resulting reaction mixture was pumped at 0 °C together with a solution of TMSOTf (0.1 M in  $\text{CH}_2\text{Cl}_2$ , 0.7 equiv, 56  $\mu\text{L}/\text{min}$ ) and a solution of propargyl alcohol (1 M in  $\text{CH}_2\text{Cl}_2$ , 10 equiv, 56

$\mu\text{L}/\text{min}$ ) through the second flow reactor R1 resulting in a total flow rate of  $252 \mu\text{L}/\text{min}$  and a residence time of 4.2 min. The reaction mixture was collected in a glass vial containing a sat.  $\text{NaHCO}_3$  solution. The phases were separated and the organic phase was dried over  $\text{Na}_2\text{SO}_4$ , filtered and concentrated in vacuo. Flash column chromatography (PE/EtOAc, 4:1) afforded propargyl glycoside **6** as a yellowish oil in a yield of 43% based on the steady state.  $R_f = 0.59$  (PE/EtOAc, 1:1).

**$^1\text{H}$  NMR** (400 MHz,  $\text{CDCl}_3$ ):  $\delta$  5.25 (app. t,  $J = 9.4$  Hz, 1H, 2-H), 5.11 (app. t,  $J = 9.7$  Hz, 1H, 3-H), 5.02 (dd,  $J_{4,5} = 9.5$  Hz,  $J = 7.9$  Hz, 1H, 4-H), 4.79 (d,  $J_{1,2} = 7.9$  Hz, 1H, 1-H), 4.39 (s, 1H,  $1'\text{-H}_a$ ), 4.38 (s, 1H,  $1'\text{-H}_b$ ), 4.28 (dd,  $J_{6a,6b} = 12.3$  Hz,  $J_{6a,5} = 4.6$  Hz, 1-H, 6- $\text{H}_a$ ), 4.16 (dd,  $J_{6a,6b} = 12.3$  Hz,  $J_{6b,5} = 2.5$  Hz, 6- $\text{H}_b$ ), 3.74 (ddd,  $J_{5,4} = 10.3$  Hz,  $J_{5,6a} = 4.6$  Hz,  $J_{5,6b} = 2.4$  Hz, 1H, 5-H), 2.48 (app. t,  $J = 2.4$  Hz, 1H,  $3'\text{-H}$ ), 2.10, 2.07, 2.04, 2.02 (4 s, 12H,  $4 \times \text{COCH}_3$ ) ppm.

**$^{13}\text{C}$  NMR** (100 MHz,  $\text{CDCl}_3$ ):  $\delta$  170.7, 170.3, 169.4, 169.4 ( $4 \times \text{COCH}_3$ ), 98.1 (C-1), 78.1 (C-2'), 75.5 (C-3'), 72.7 (C-2), 71.9 (C-3), 70.9 (C-4), 68.3 (C-5), 61.7 (C-6), 55.9 (C-1'), 20.7, 20.7, 20.6, 20.6 ( $4 \times \text{COCH}_3$ ) ppm.

Spectroscopic data are in agreement with reported literature.<sup>[5]</sup>

### Multistep synthesis of 4-pentynyl 2,3,4,6-tetra-*O*-acetyl- $\beta$ -D-glucopyranoside (**7**)

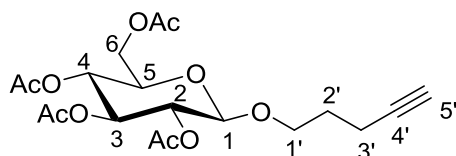

The same procedure as for the preparation of propargyl glycoside **6** was used for the synthesis of 4-pentynyl glucopyranoside **7** with 4-pentynol as alcohol. The product was obtained as a yellowish oil in a yield of 69% based on the steady state.  $R_f = 0.35$  (PE/EtOAc, 1:1).

**$^1\text{H}$ -NMR** (400 MHz,  $\text{CDCl}_3$ ):  $\delta$  5.17 (app. t,  $J = 9.5$  Hz, 1H, 3-H), 5.04 (app. t,  $J = 9.7$  Hz, 1H, 4-H), 4.94 (dd,  $J_{2,3} = 9.7$  Hz,  $J_{2,1} = 7.9$  Hz, 1H, 2-H), 4.47 (d,  $J_{1,2} = 7.9$  Hz, 1H, 1-H), 4.23 (dd,  $J_{6a,6b} = 12.2$  Hz,  $J_{6a,5} = 4.6$  Hz, 1H, 6- $\text{H}_a$ ), 4.09 (dd,  $J_{6b,6a} = 12.2$  Hz,  $J_{6b,5} = 2.4$  Hz, 1H, 6- $\text{H}_b$ ), 3.92 (dt,  $J_{1'a,1'b} = 9.8$  Hz,  $J_{1'a,2'} = 5.4$  Hz, 1H,  $1'\text{-H}_a$ ), 3.67 (ddd,  $J_{5,4} = 9.9$  Hz,  $J_{5,6a} = 4.6$  Hz,  $J_{5,6b} = 2.4$  Hz, 1H, 5-H), 3.59 (ddd,  $J_{1'b,1'a} = 9.7$  Hz,  $J = 8.2$  Hz,  $J = 5.1$  Hz, 1H,  $1'\text{-H}_b$ ), 2.23–2.19 (m, 2H,  $3'\text{-H}$ ), 2.04, 2.01, 1.98, 1.96 (4 s, 12H,  $4 \times \text{COCH}_3$ ), 1.91 (t,  $J_{5',6'} = 2.6$  Hz, 1H,  $5'\text{-H}$ ), 1.84–1.68 (m, 2H,  $2'\text{-H}$ ) ppm.

**$^{13}\text{C}$ -NMR** (100 MHz,  $\text{CDCl}_3$ ):  $\delta$  170.5, 170.1, 169.3, 169.2 ( $4 \times \text{COCH}_3$ ), 100.9 (C-1), 83.2 (C-4'), 72.6 (C-3), 71.6 (C-2), 71.2 (C-4), 68.7 (C-5'), 68.3 (C-1'), 68.2 (C-5), 61.8 (C-6), 28.1 (C-2'), 20.6, 20.5, 20.5, 20.5, ( $4 \times \text{COCH}_3$ ), 14.6 (C-3') ppm.

Spectroscopic data are in agreement with reported literature.<sup>[6]</sup>

### Flow synthesis of 2,3,4,6-tetra-*O*-acetyl- $\beta$ -D-glucopyranosyl azide (**8**)

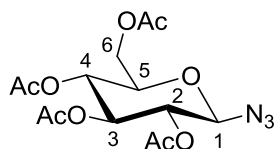

A solution of  $\beta$ -D-glucose pentaacetate (**1**, 0.5 M in dry  $\text{CH}_2\text{Cl}_2$ , 1 equiv, 27  $\mu\text{L}/\text{min}$ ), a solution of trimethylsilyl azide (1 M in  $\text{CH}_2\text{Cl}_2$ , 4 equiv, 55  $\mu\text{L}/\text{min}$ ) and a solution of  $\text{SnCl}_4$  (0.2 M in  $\text{CH}_2\text{Cl}_2$ , 1 equiv, 68  $\mu\text{L}/\text{min}$ ) were mixed and pumped through flow reactor R1 with a total reactor volume of 1.05 mL at rt, resulting in a total flow rate of 150  $\mu\text{L}/\text{min}$  and a residence time of 7 min. The reaction mixture was collected in a glass vial containing sat.  $\text{NaHCO}_3$  solution. The phases were separated and the organic phase was dried over  $\text{Na}_2\text{SO}_4$ , filtered and concentrated in vacuo. Flash column chromatography (toluene/EtOAc, 9:1) afforded glycosyl azide **8** as a white solid in a yield of 80% based on the steady state.  $R_f$  = 0.55 (PE/EtOAc, 1:1).

**$^1\text{H}$  NMR** (400 MHz,  $\text{CDCl}_3$ ):  $\delta$  5.23 (app.t,  $J_{3,2}=9.5$  Hz,  $J_{3,4}=9.4$  Hz, 1H, 3-H), 5.12 (app. t,  $J_{4,5}=9.9$  Hz,  $J_{4,3}=9.5$  Hz, 1H, 4-H), 4.97 (app.t,  $J_{2,3}=9.5$  Hz  $J_{2,1}=8.9$  Hz, 1H, 2-H), 4.66 (d,  $J_{1,2}=8.8$  Hz, 1H, 1-H), 4.29 (dd,  $J_{6a,6b}=12.4$  Hz,  $J_{6a,5}=4.7$  Hz, 1H, 6-H<sub>a</sub>), 4.19 (dd,  $J_{6b,6a}=12.4$  Hz,  $J_{6b,5}=2.2$  Hz, 1H, 6-H<sub>b</sub>), 3.80 (ddd,  $J_{5,4}=10.0$  Hz,  $J_{5,6a}=4.7$  Hz,  $J_{5,6b}=2.3$  Hz, 1H, 5- H), 2.12, 2.09, 2.04, 2.02 (4 s, 12H,  $4 \times \text{COCH}_3$ ) ppm.

**$^{13}\text{C}$  NMR** (100 MHz,  $\text{CDCl}_3$ ):  $\delta$  170.6, 170.1, 169.3, 169.2 ( $4 \times \text{COCH}_3$ ), 87.9 (C-1), 74.0 (C-5), 72.6 (C-3), 70.6 (C-2), 67.9 (C-4), 61.6 (C-6), 20.7, 20.6, 20.5 20.5 ( $4 \times \text{COCH}_3$ ) ppm.

Spectroscopic data are in agreement with reported literature.<sup>[7]</sup>

## NMR spectra

$^1\text{H}$  NMR spectrum of 2,3,4,6-tetra-*O*-acetyl- $\alpha$ -D-glucopyranosyl bromide (**2**)

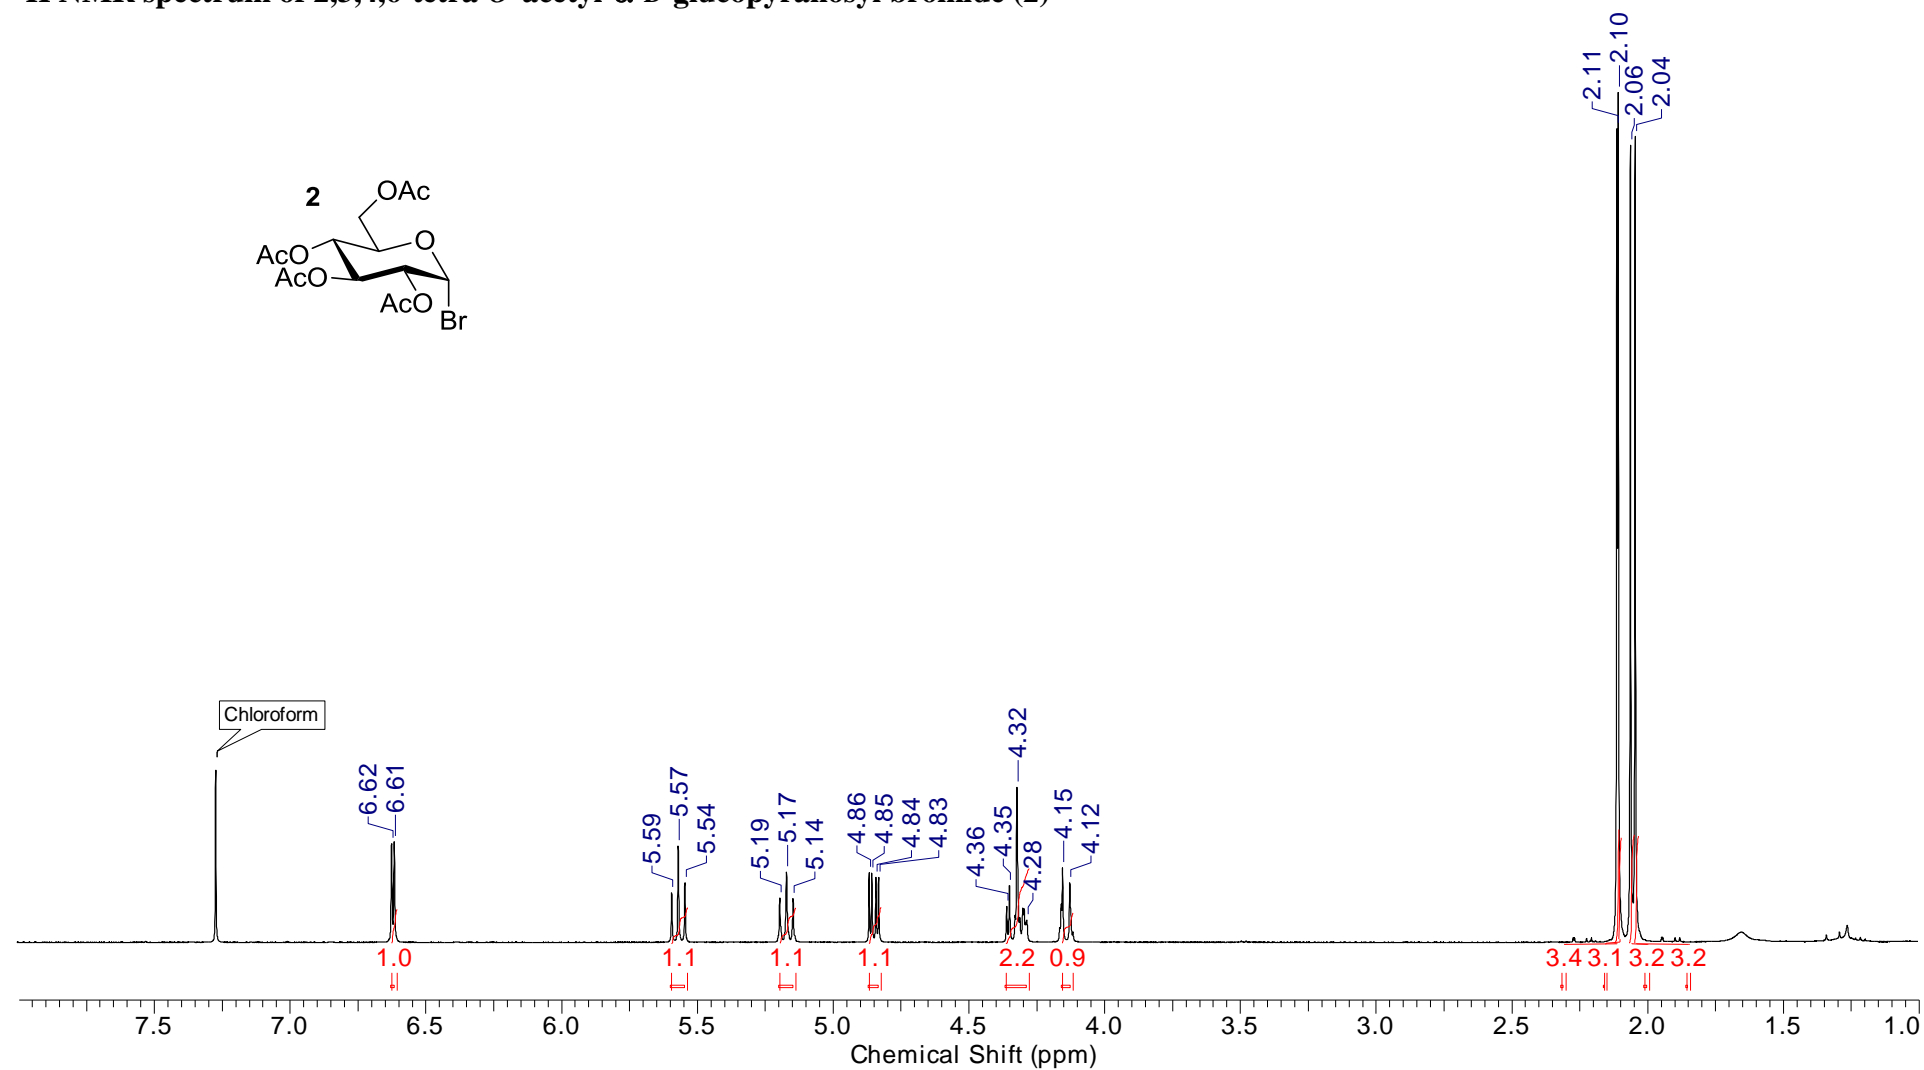

<sup>13</sup>C NMR spectrum of 2,3,4,6-tetra-*O*-acetyl- $\alpha$ -D-glucopyranosyl bromide (2)

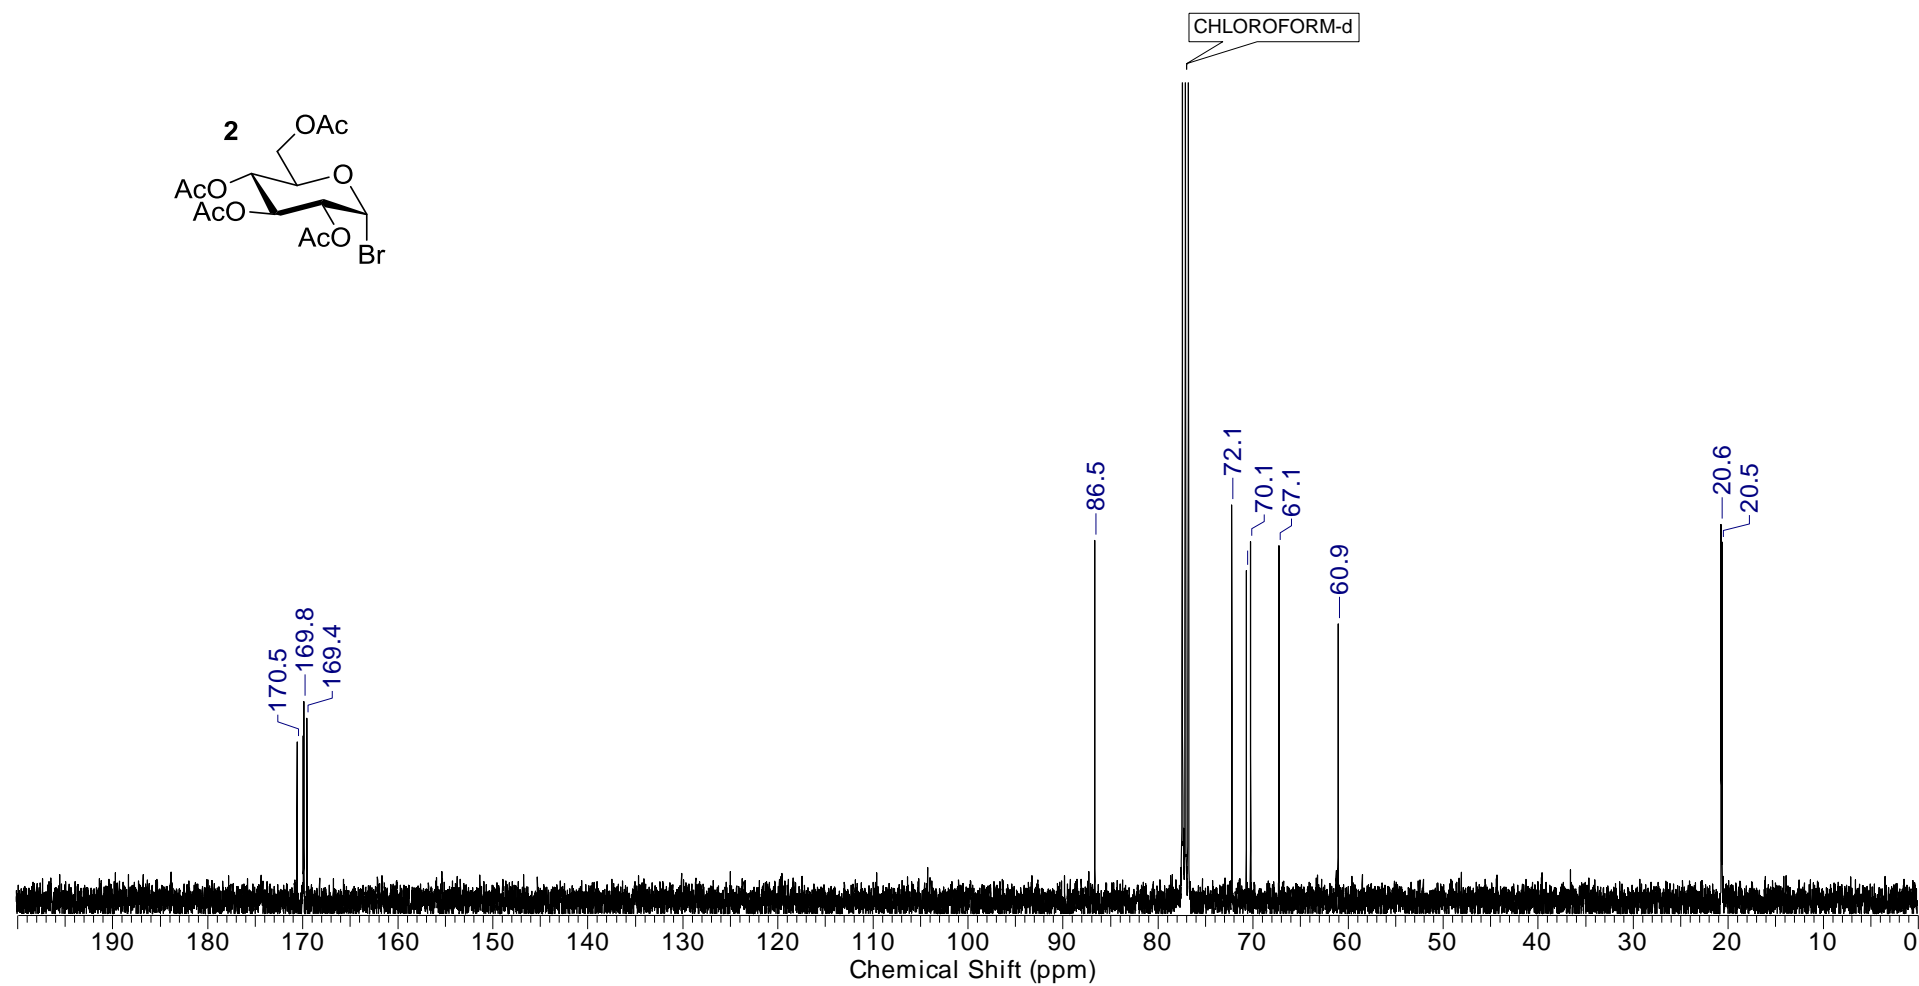

<sup>1</sup>H NMR spectrum of methyl 2,3,4,6-tetraacetyl-β-D-glucopyranoside (3)

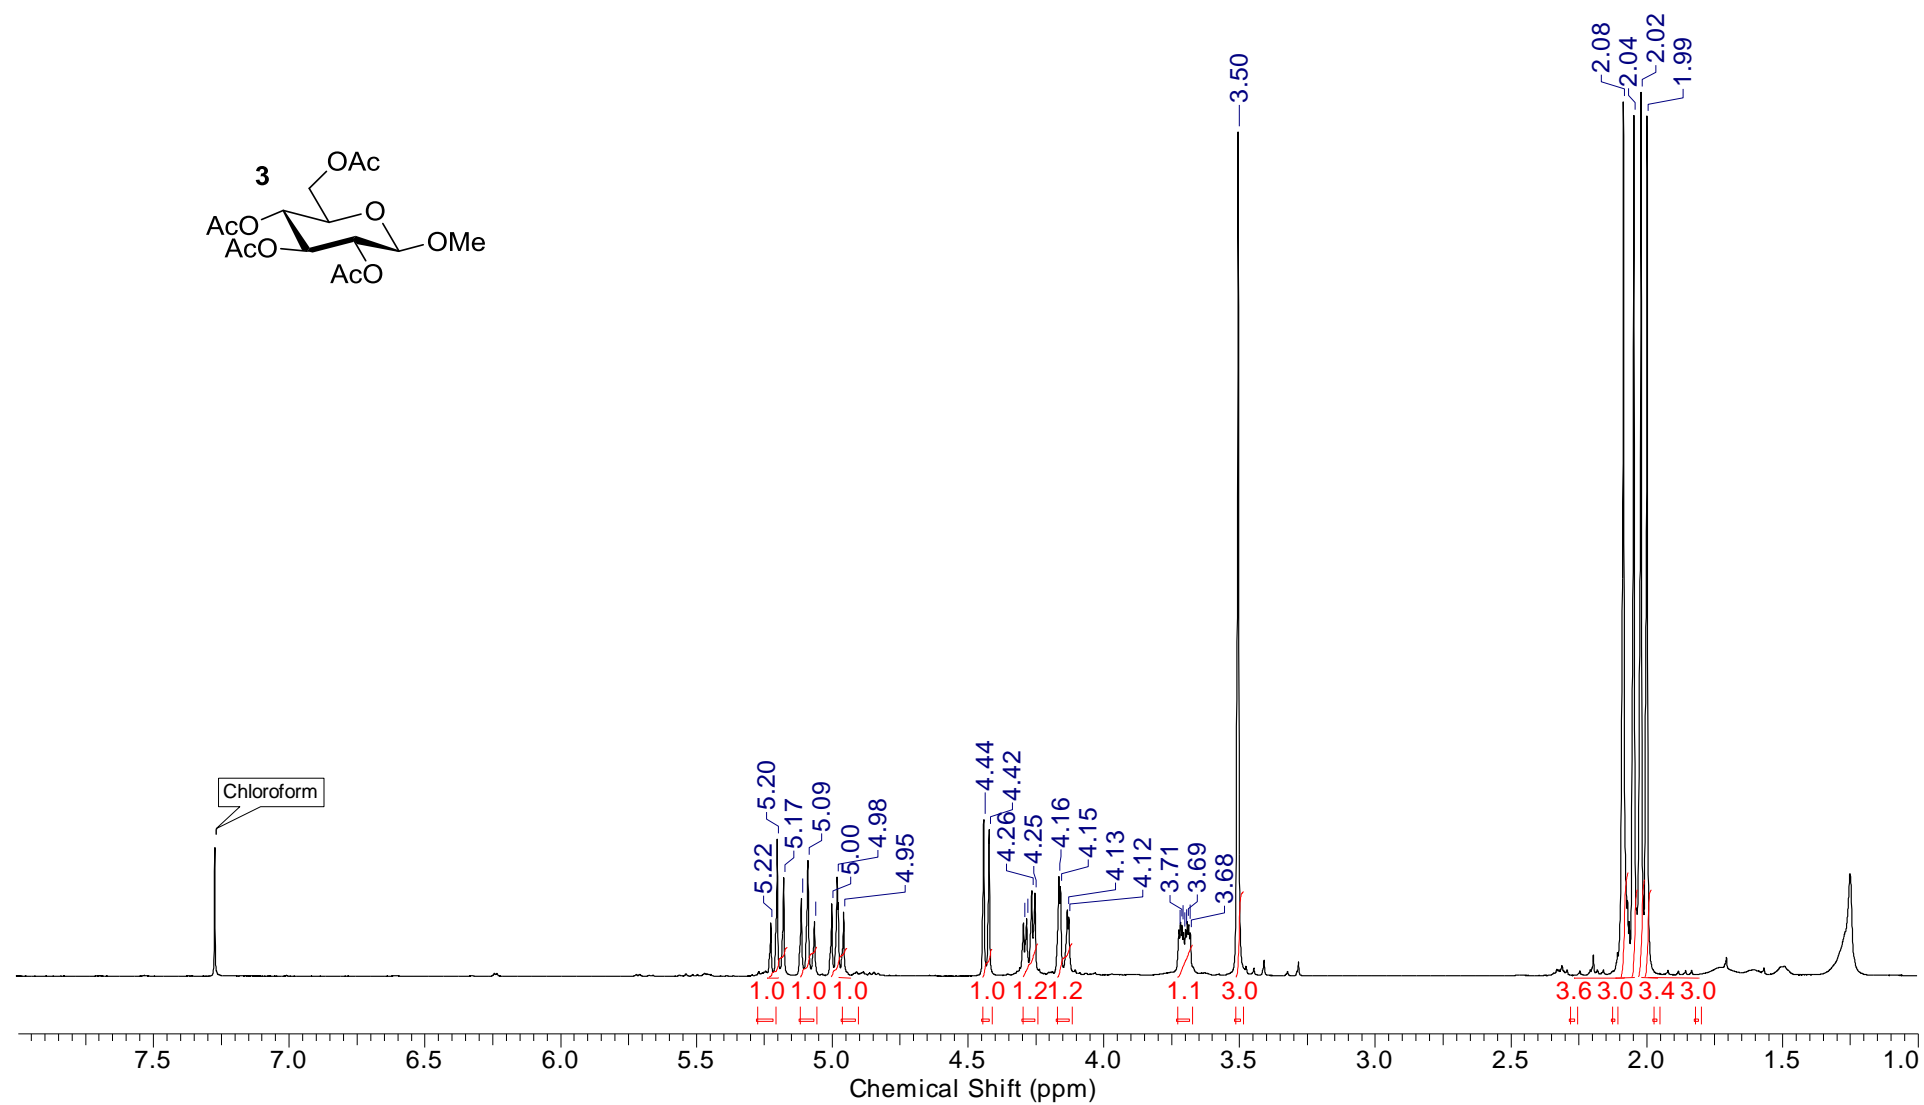

<sup>13</sup>C NMR spectrum of methyl 2,3,4,6-tetraacetyl-β-D-glucopyranoside (3)

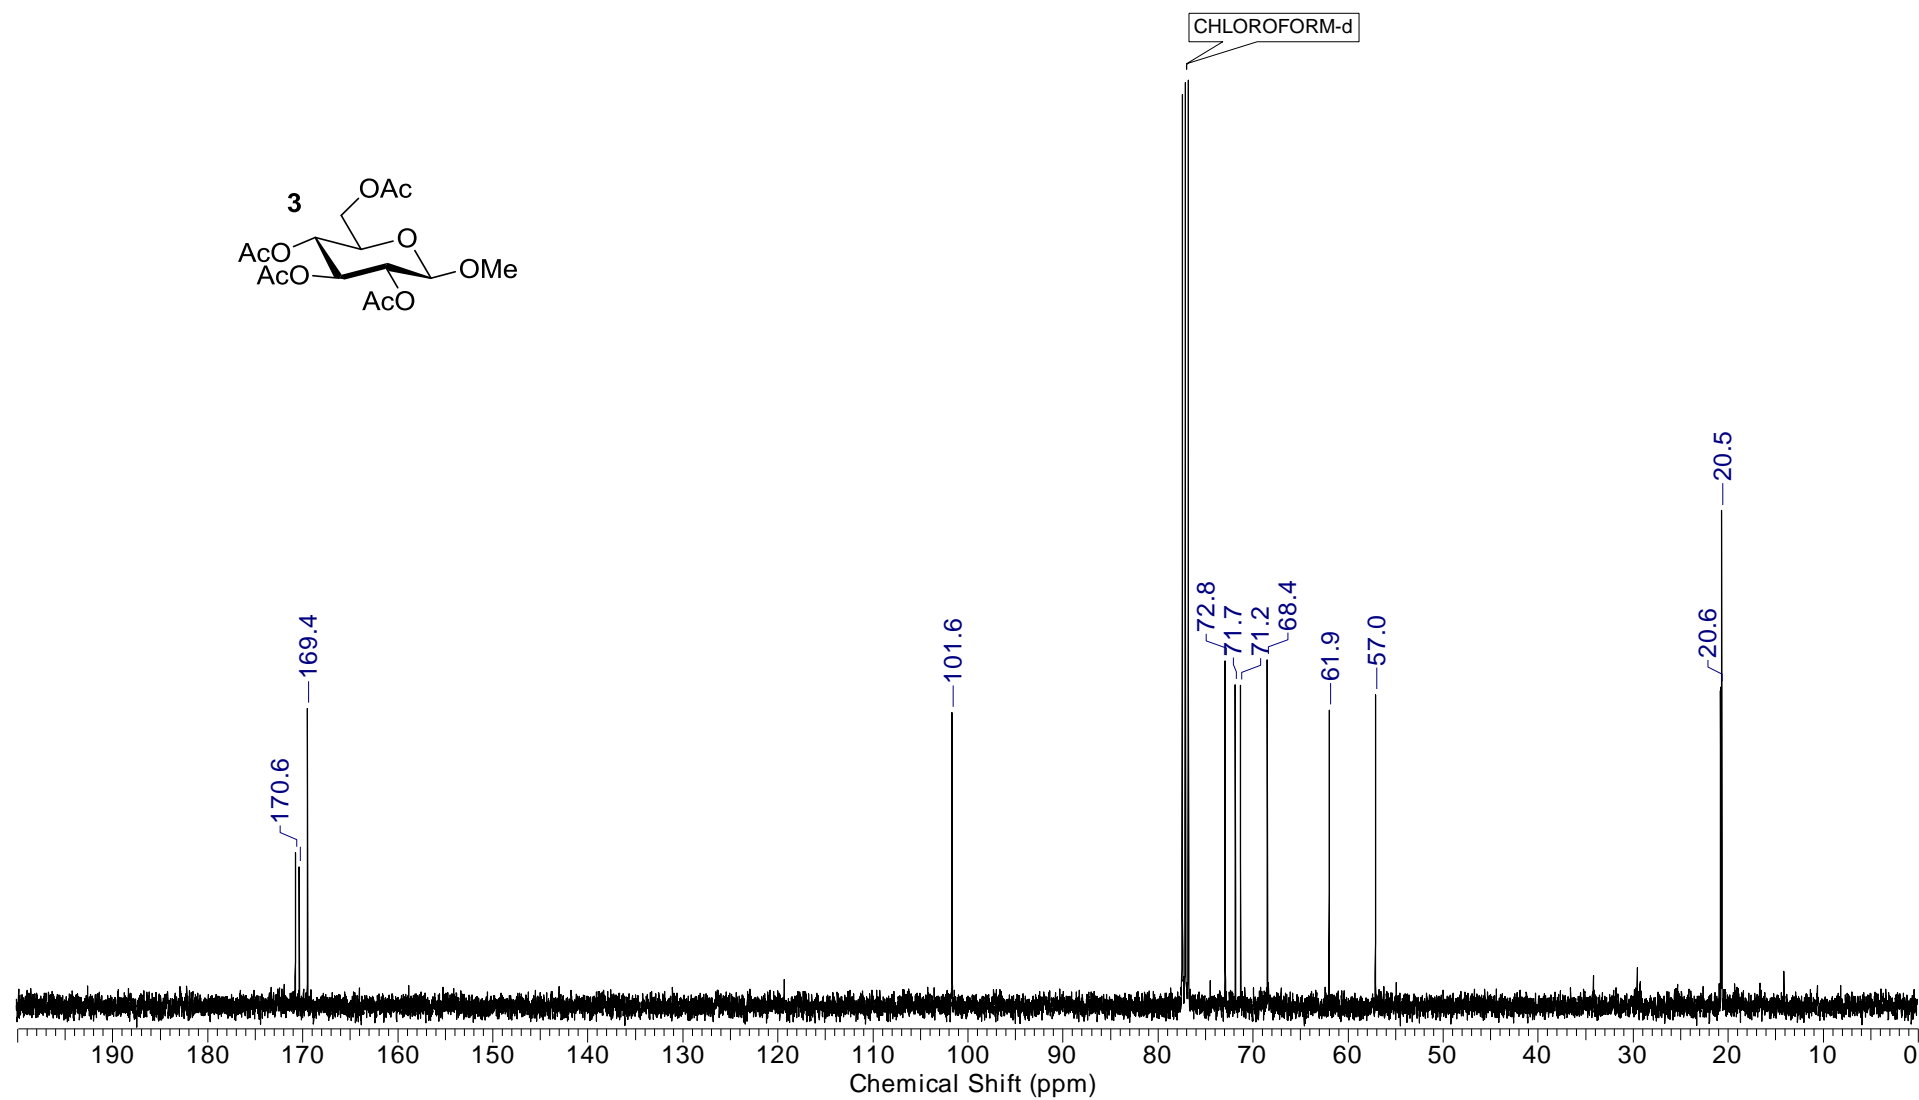

<sup>1</sup>H NMR spectrum of 2,3,4,6-tetra-*O*-acetyl-D-glucopyranose (4)

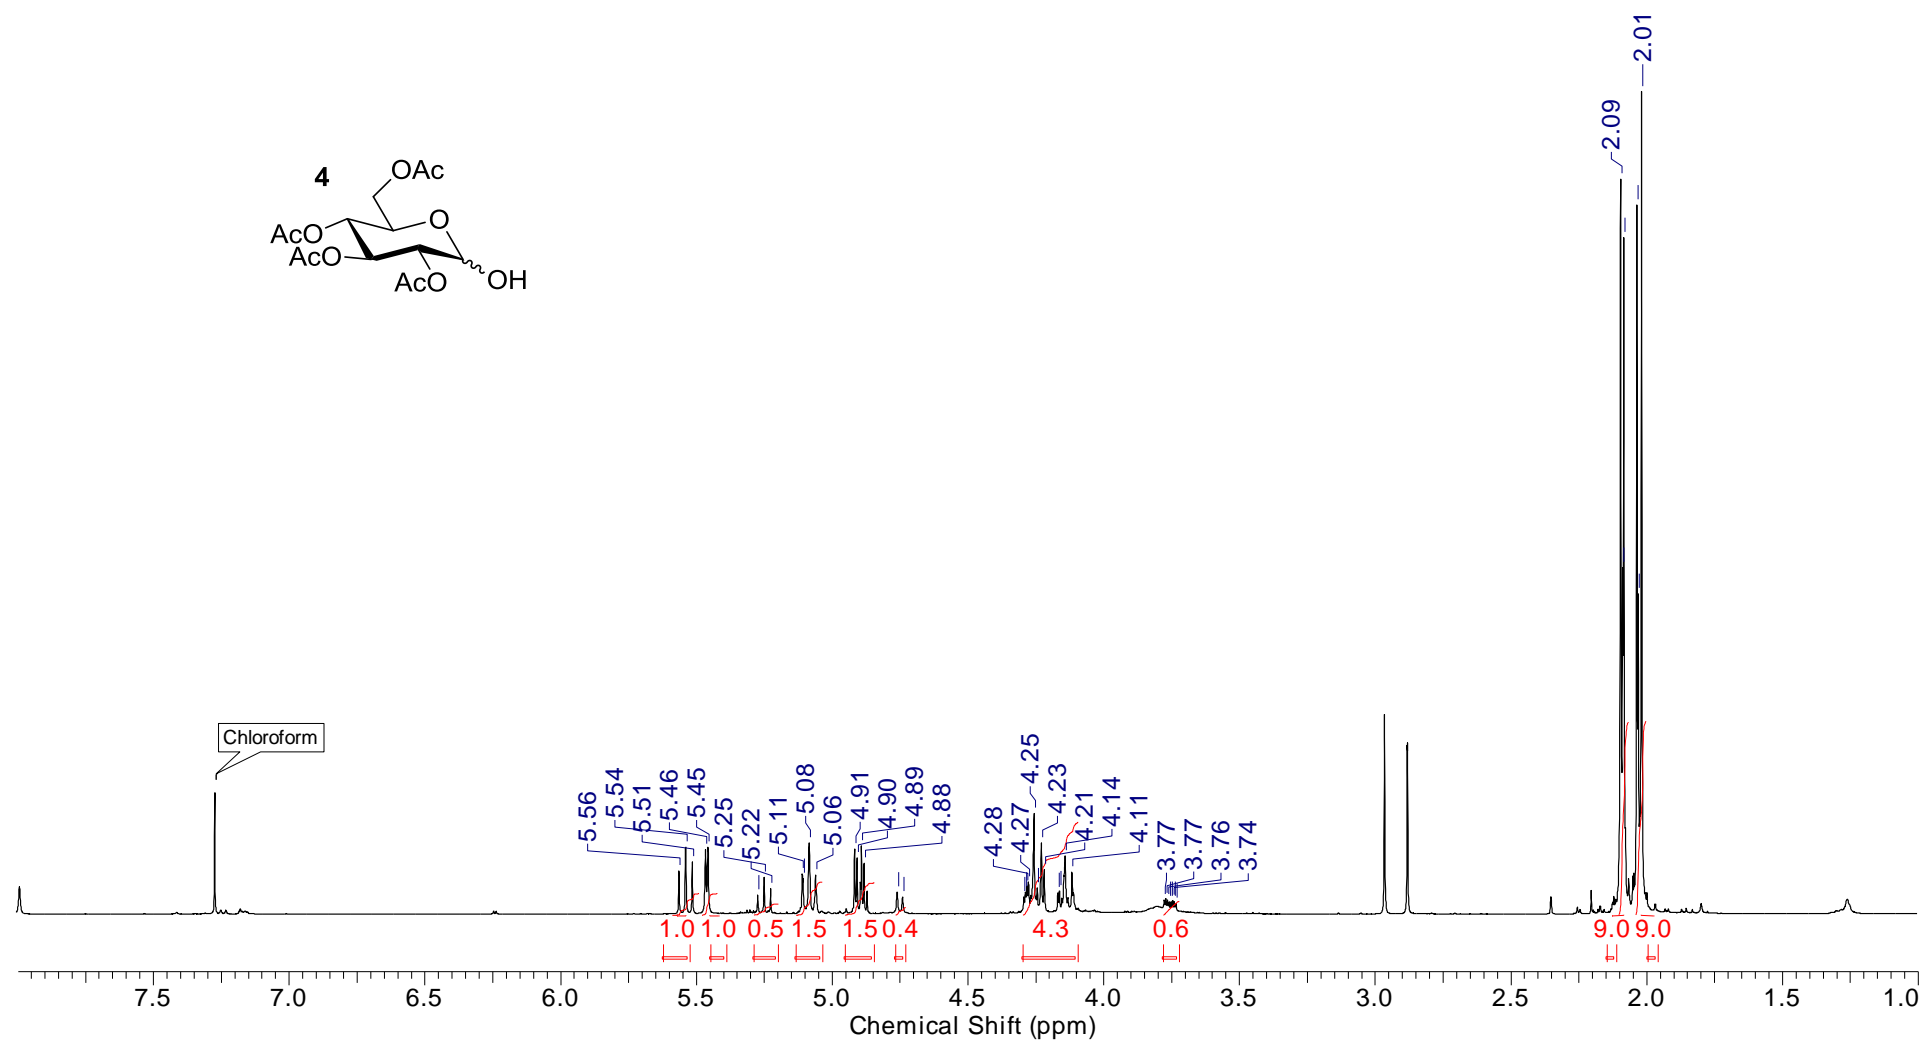

<sup>13</sup>C NMR spectrum of 2,3,4,6-tetra-*O*-acetyl-D-glucopyranose (4)

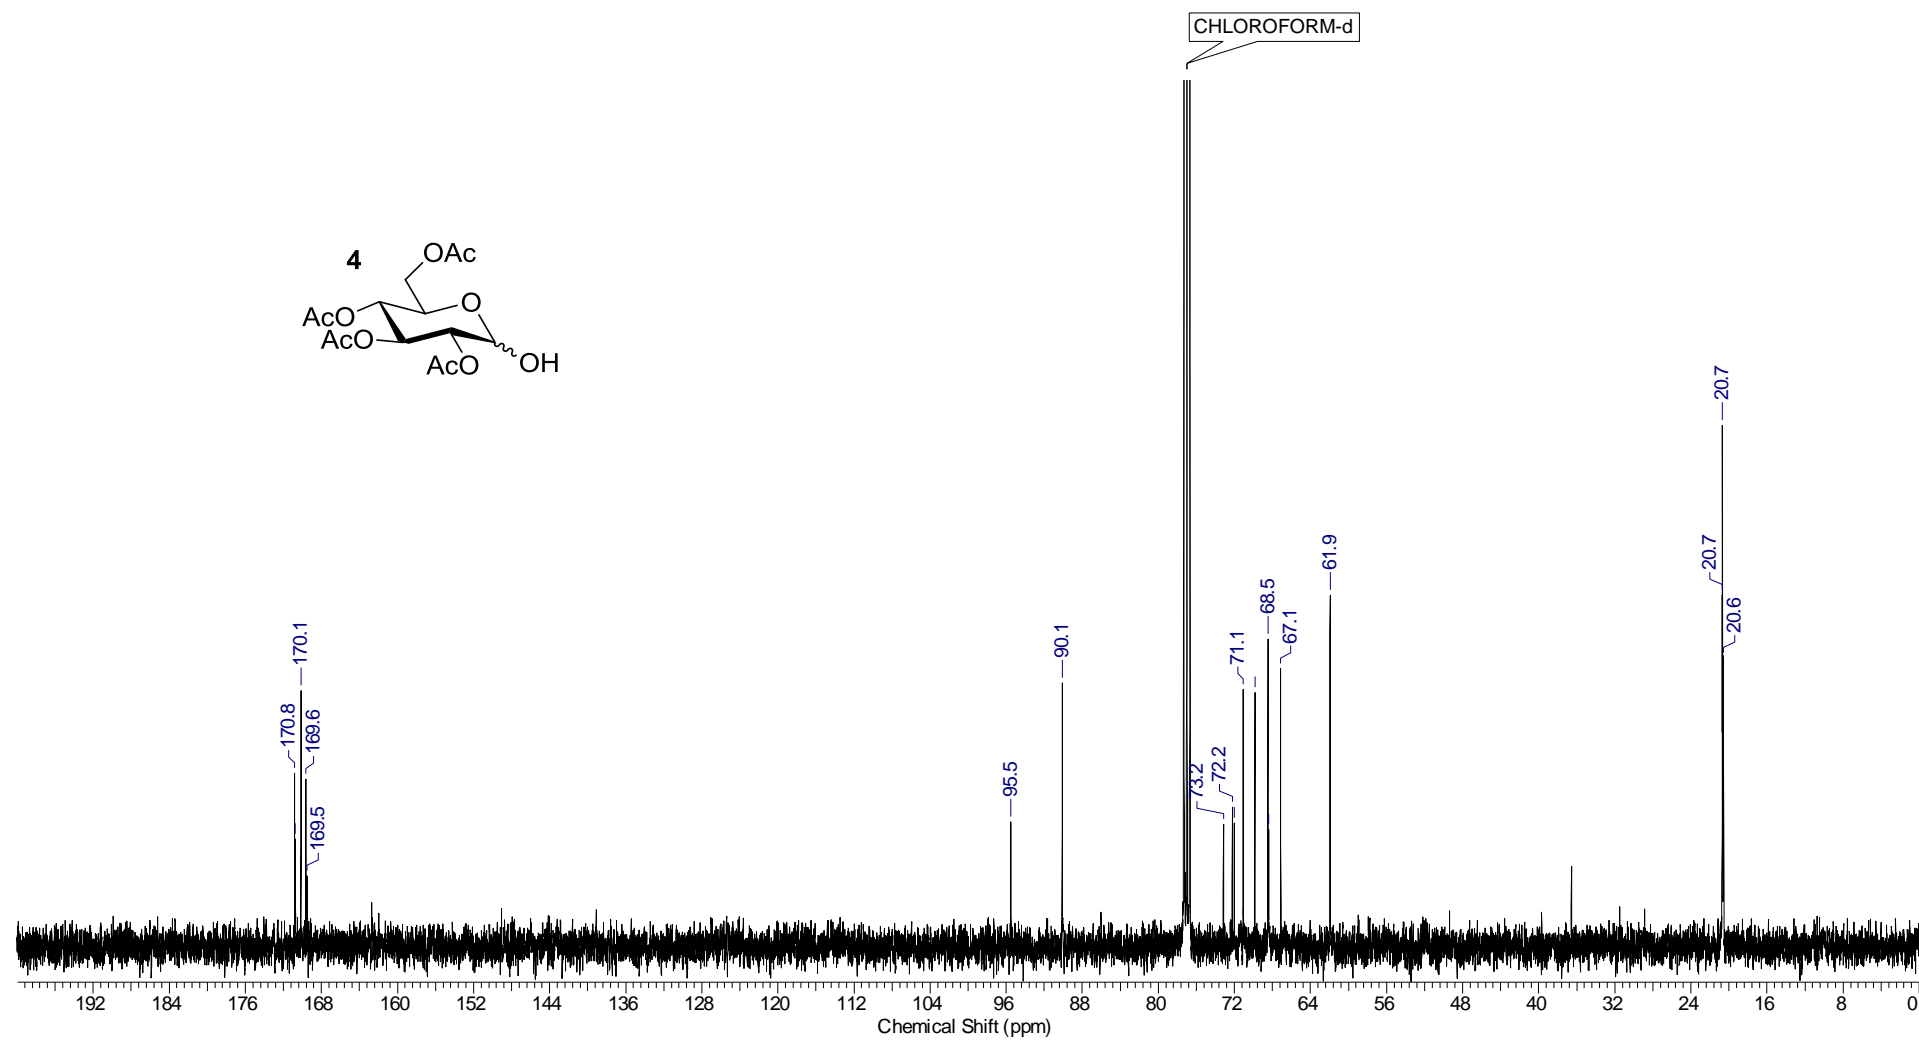

<sup>1</sup>H NMR spectrum of 2,3,4,6-tetra-*O*-acetyl- $\alpha$ -D-glucopyranosyl trichloroacetimidate (**5**)

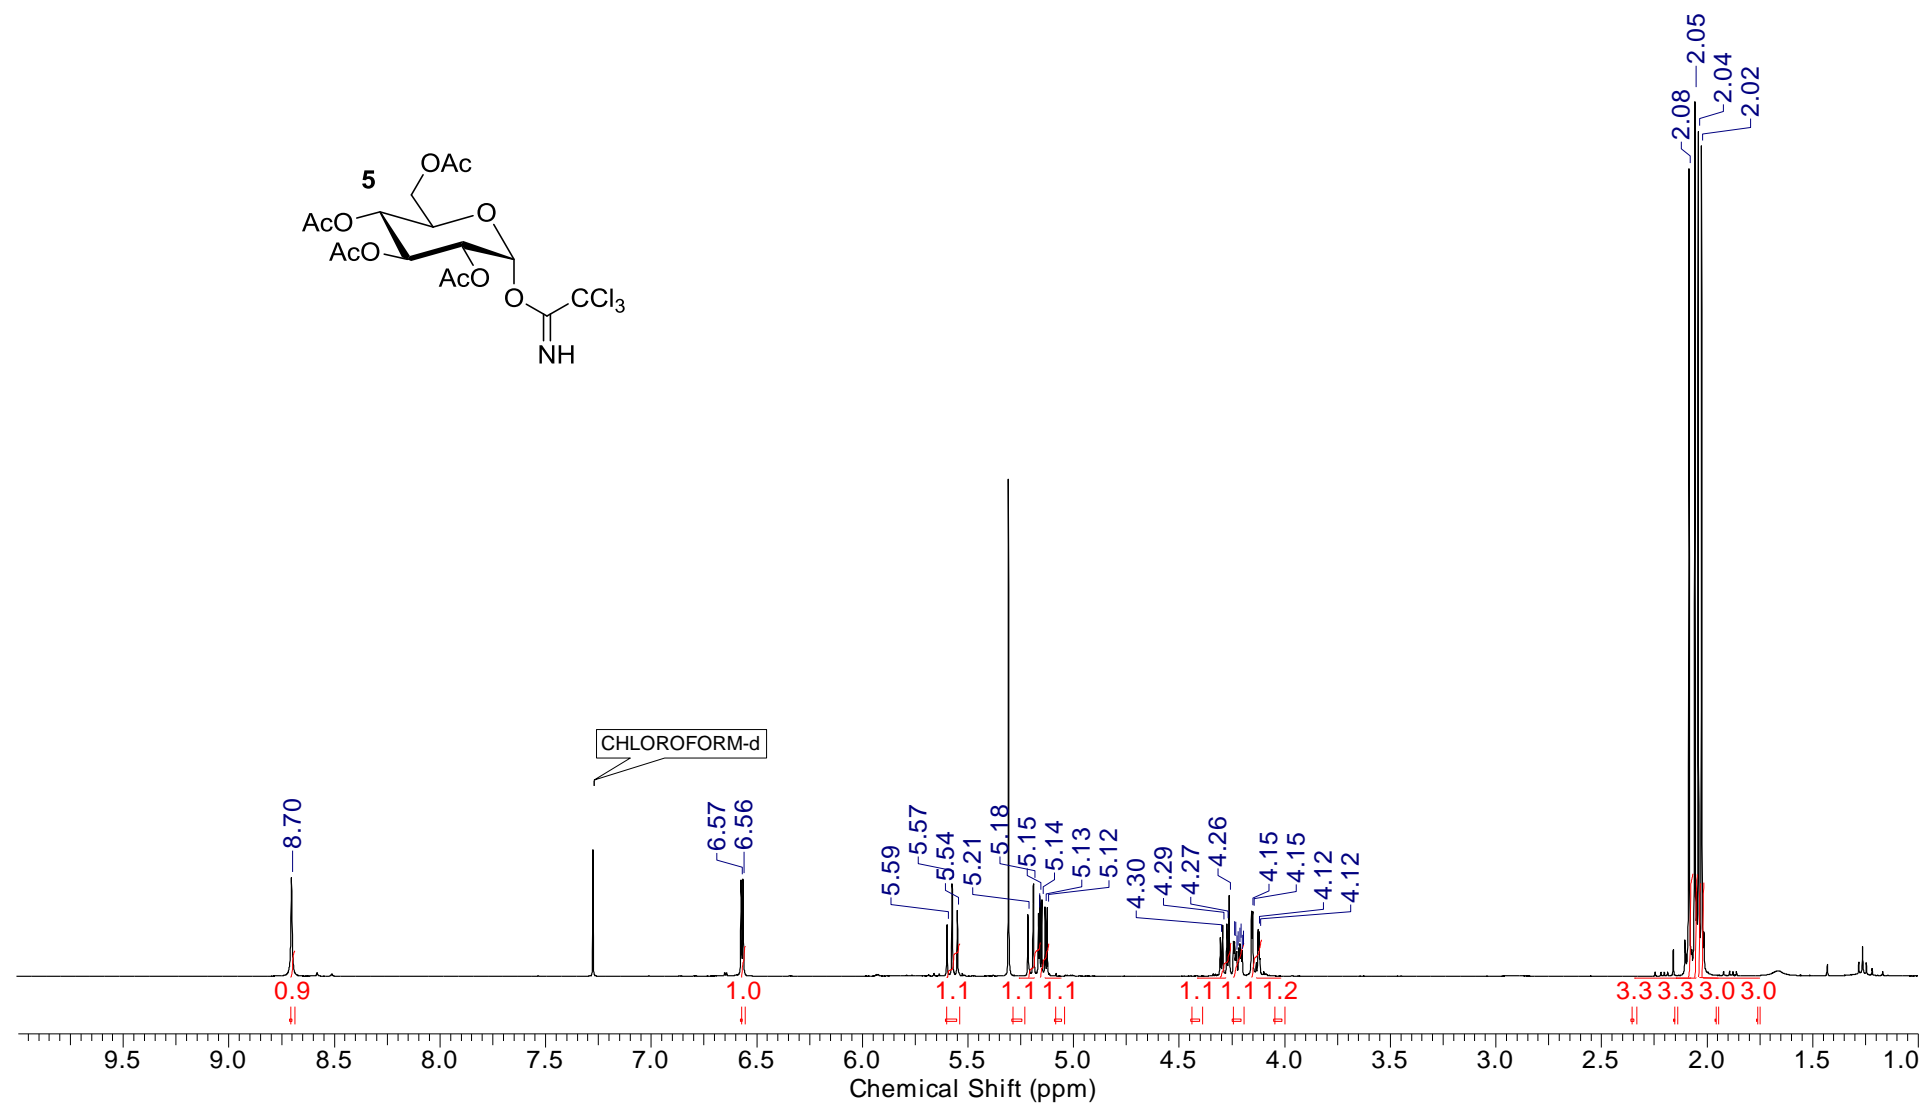

<sup>13</sup>C NMR spectrum of 2,3,4,6-tetra-*O*-acetyl- $\alpha$ -D-glucopyranosyl trichloroacetimidate (5)

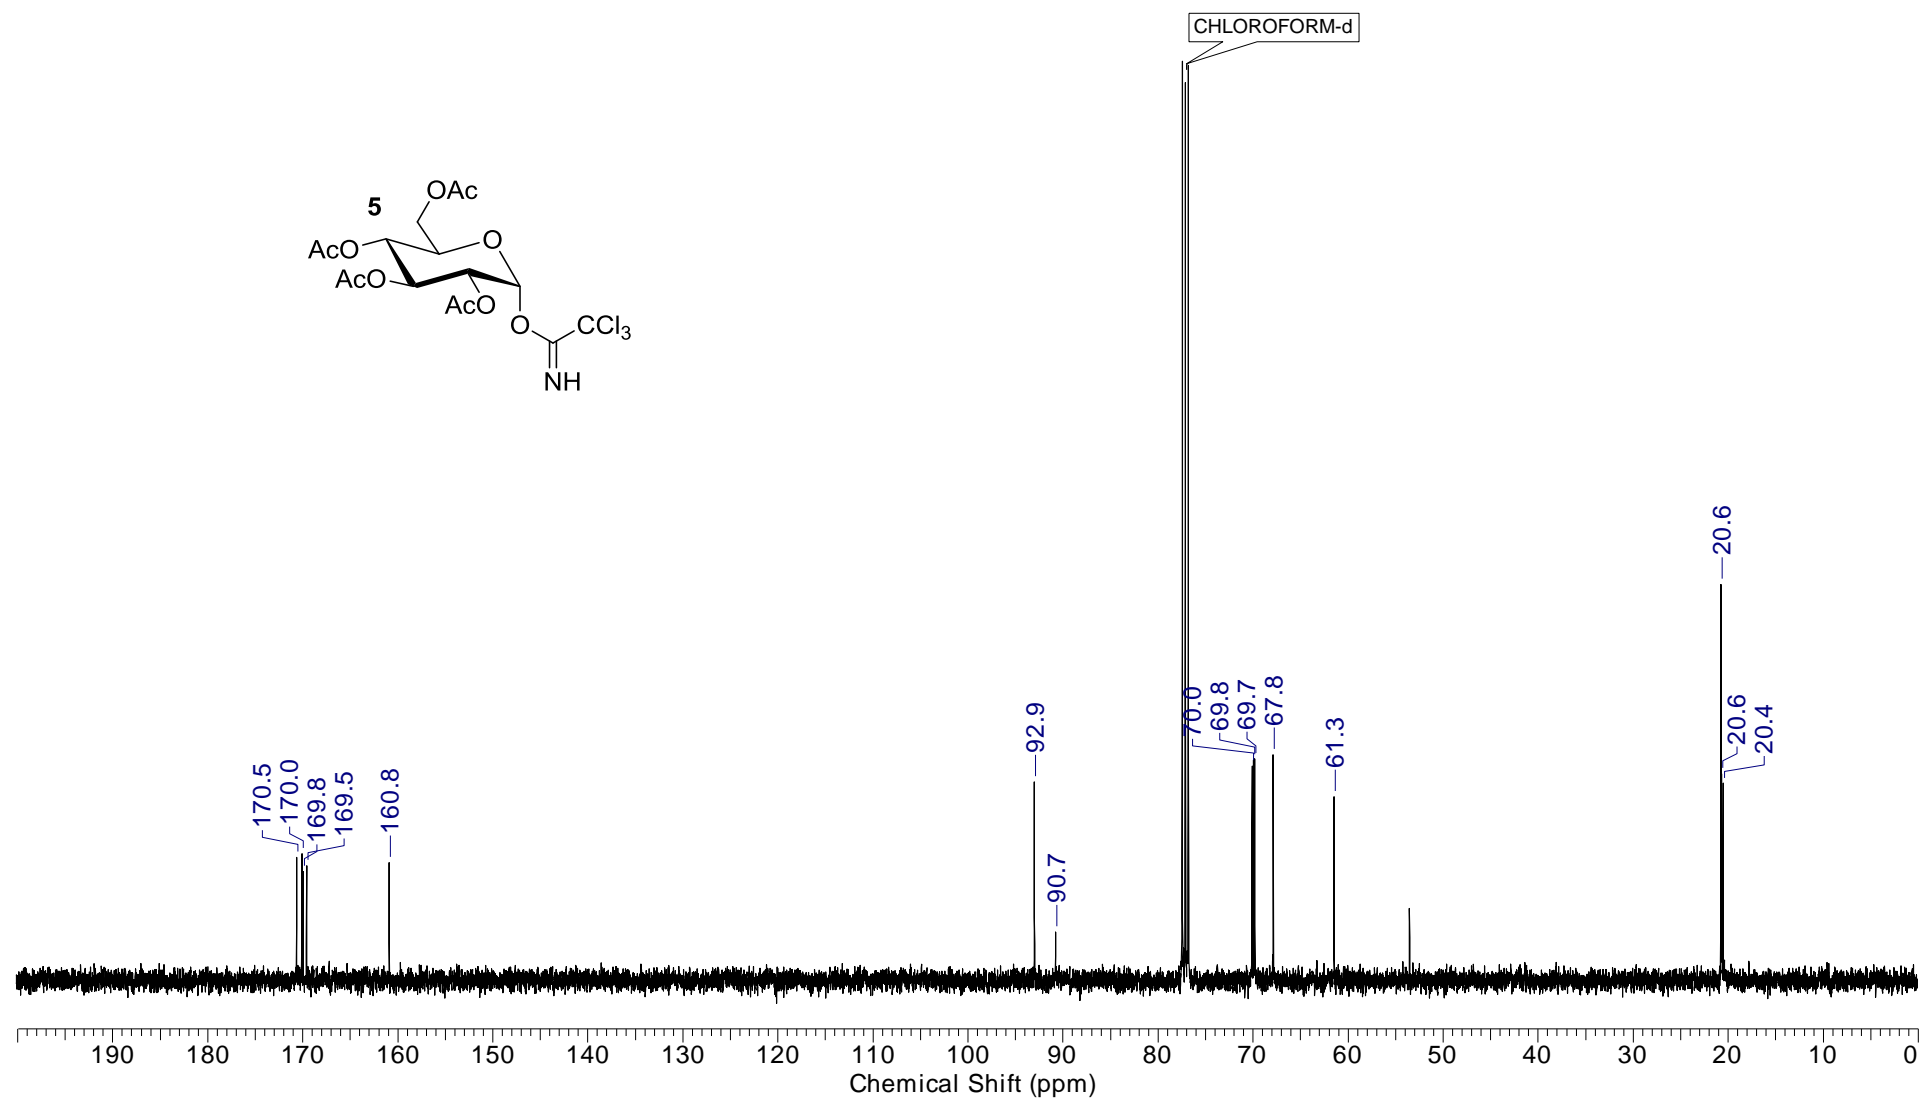

<sup>1</sup>H NMR spectrum of propargyl 2,3,4,6-tetra-*O*-acetyl-β-D-glucopyranoside (6)

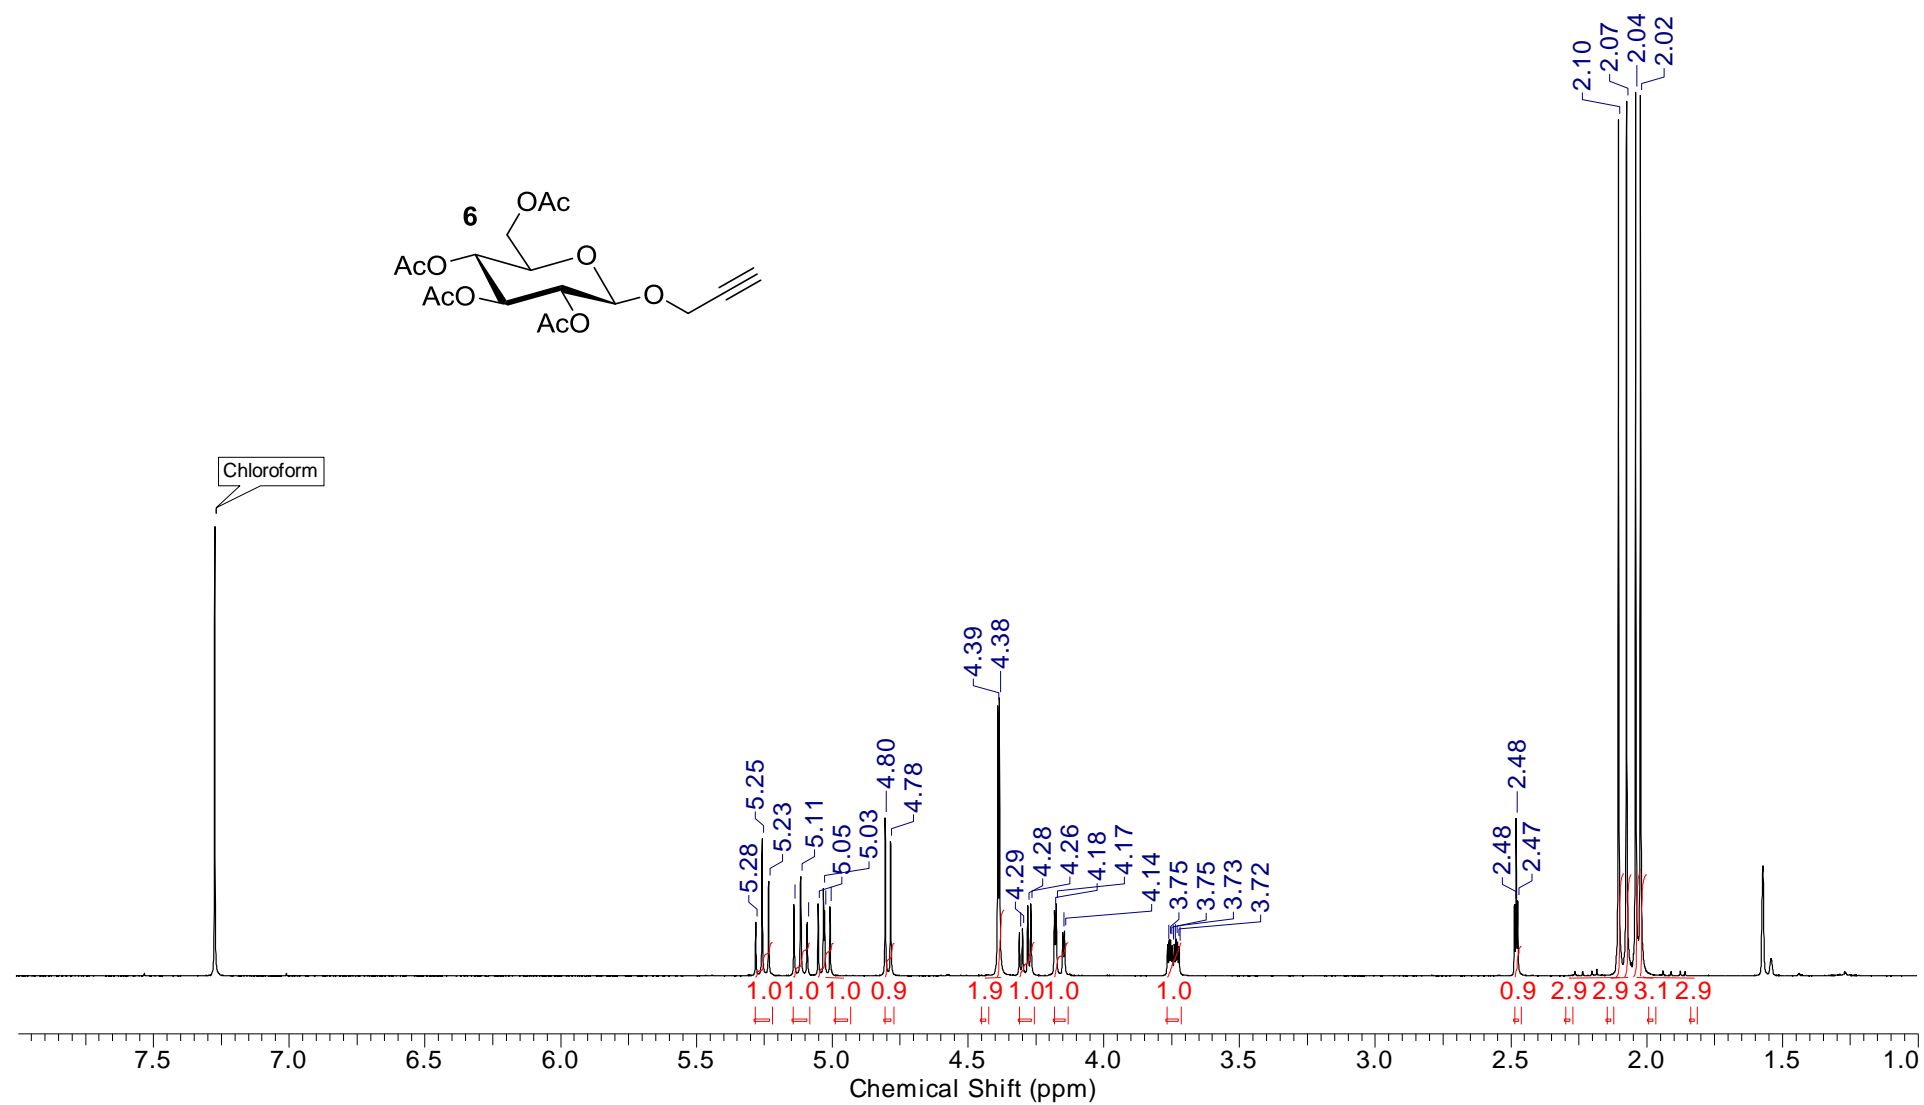

$^{13}\text{C}$  NMR spectrum of propargyl 2,3,4,6-tetra-*O*-acetyl- $\beta$ -D-glucopyranoside (**6**)

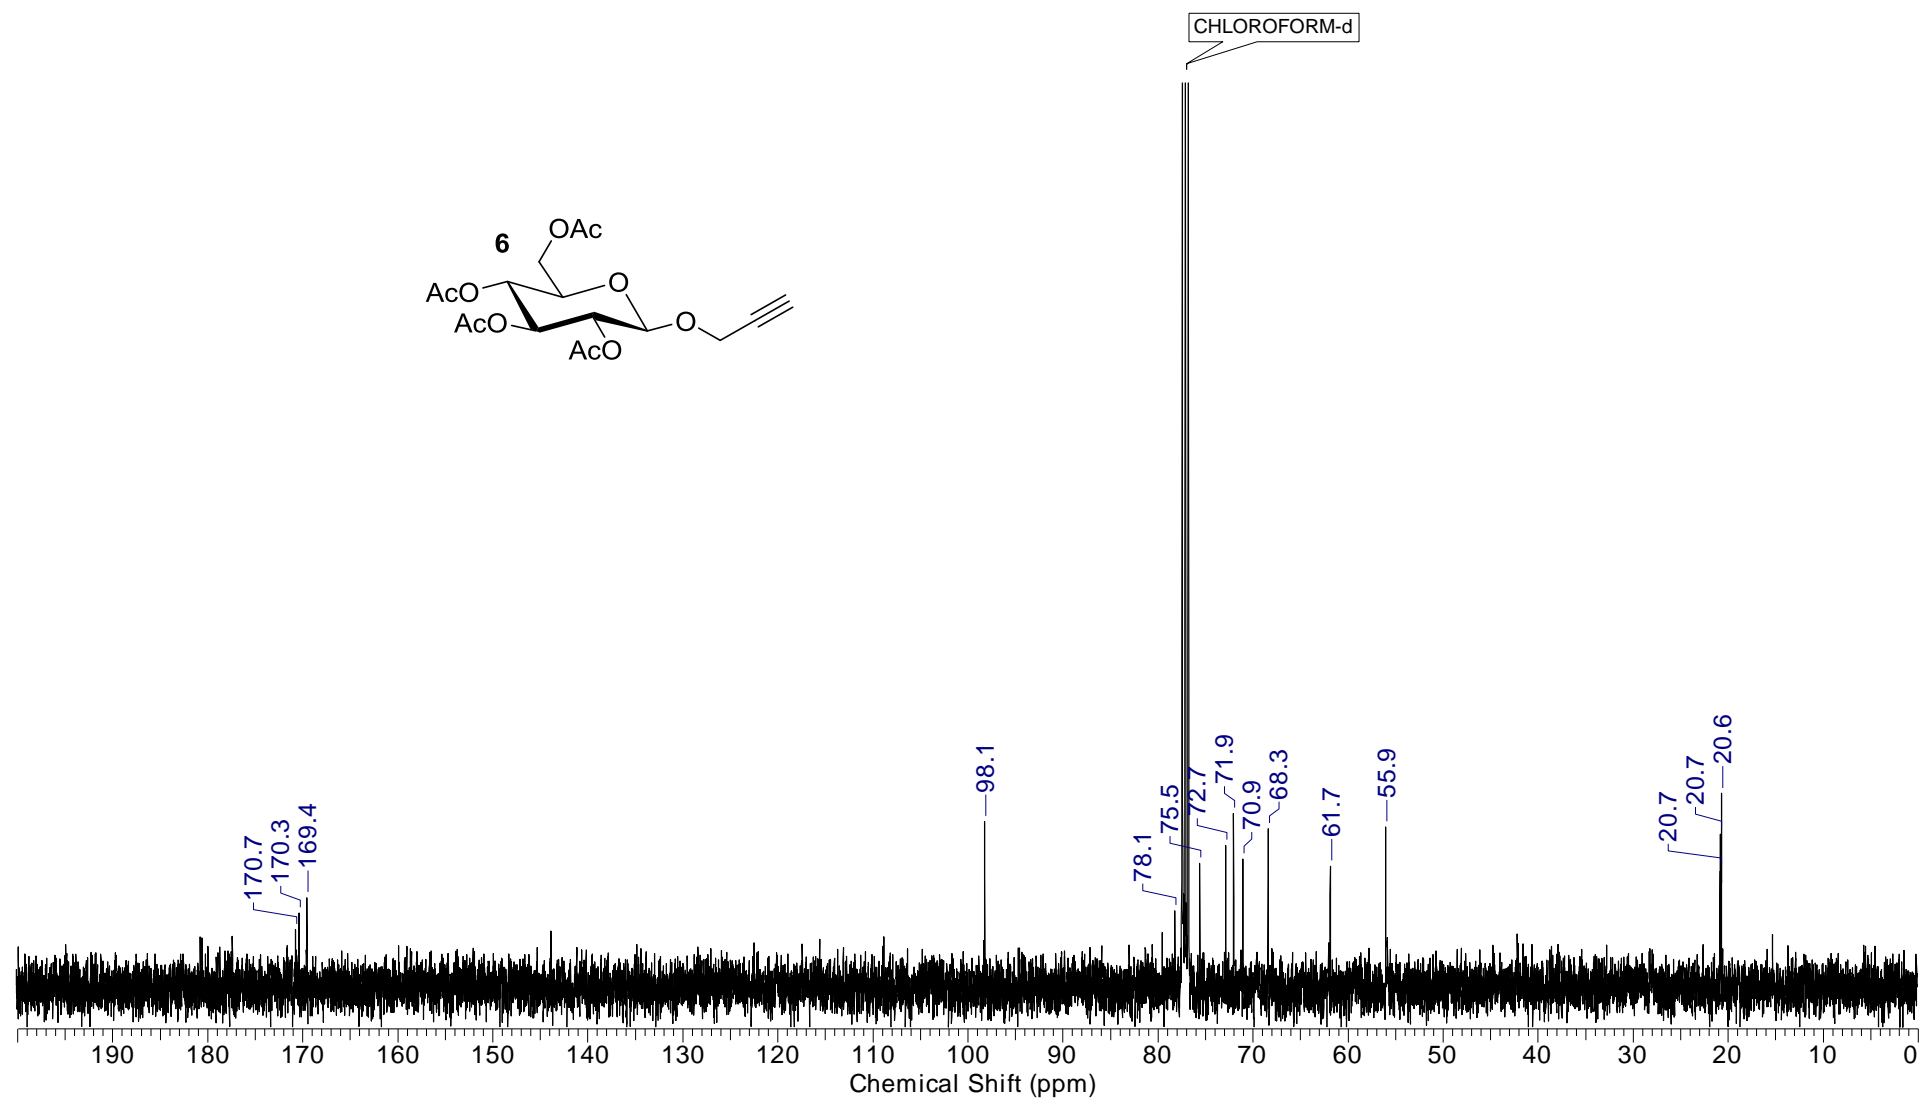

<sup>1</sup>H NMR spectrum of 4-pentynyl 2,3,4,6-tetra-*O*-acetyl-β-D-glucopyranoside (7)

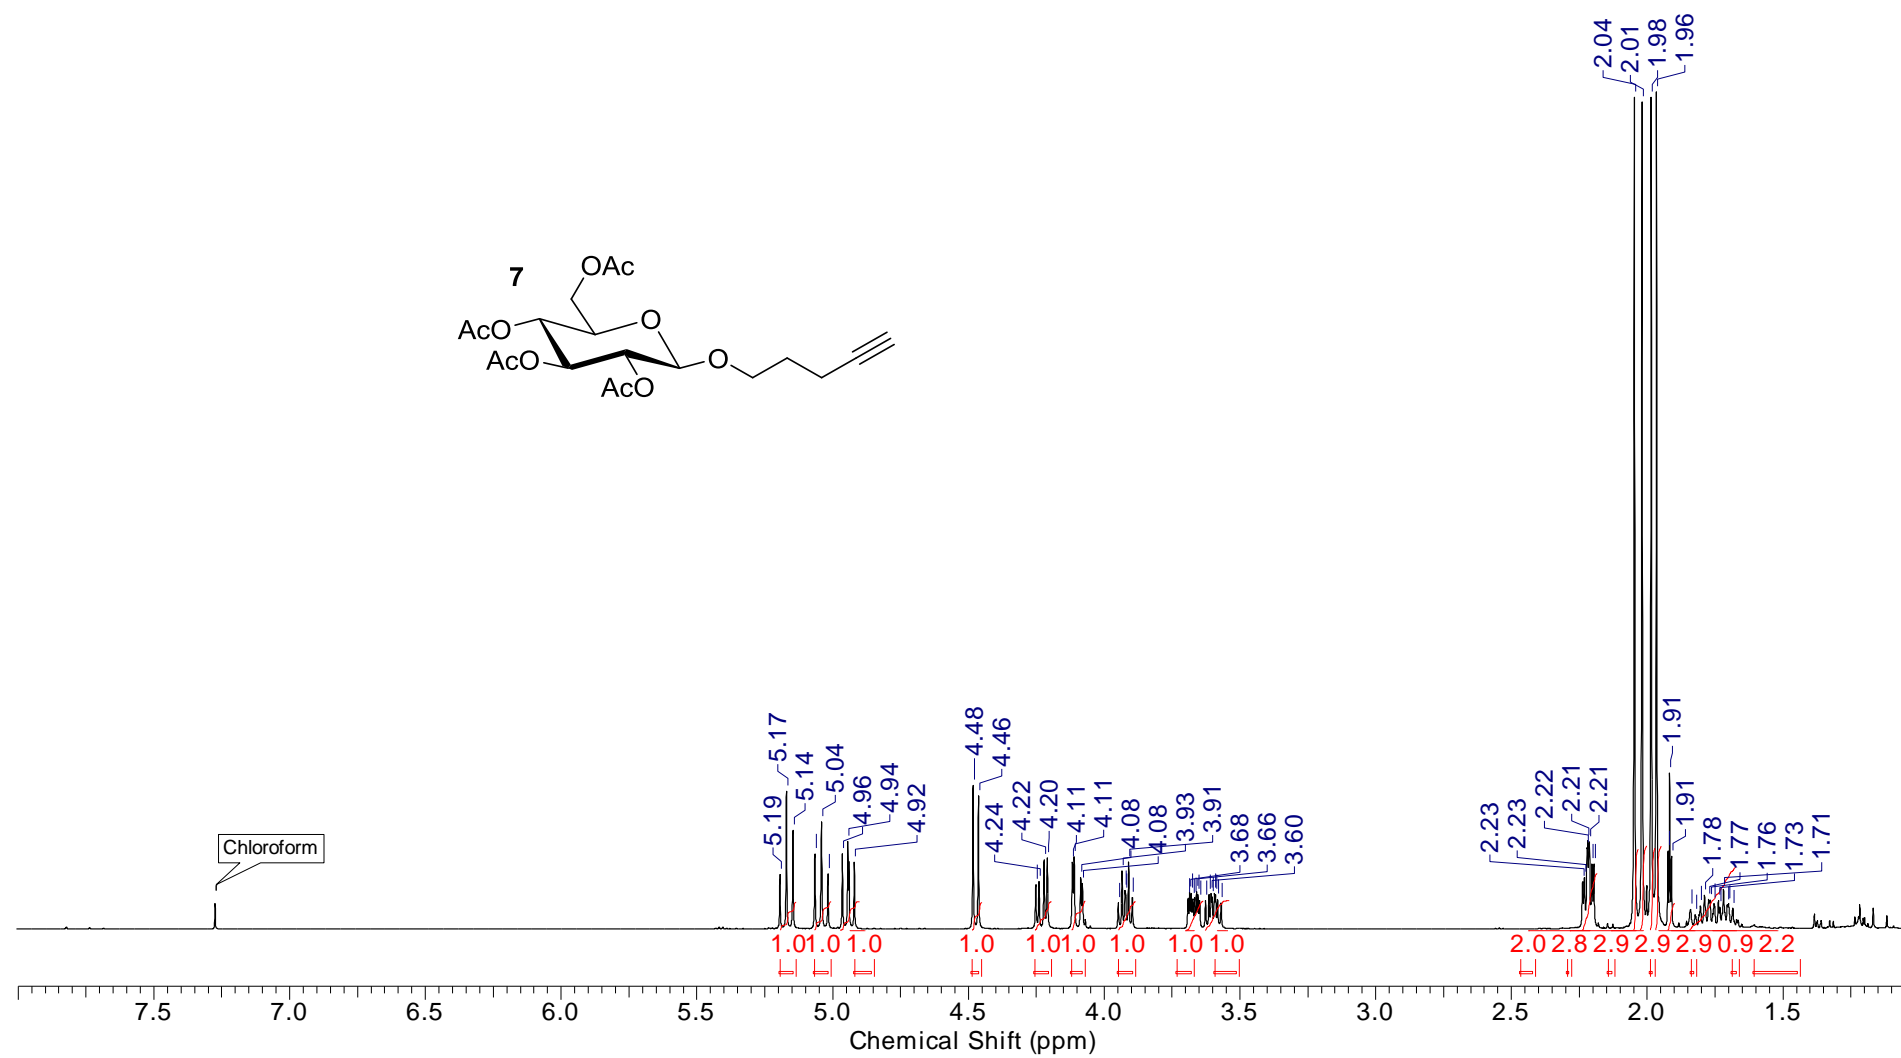

<sup>13</sup>C NMR spectrum of 4-pentynyl 2,3,4,6-tetra-*O*-acetyl-β-D-glucopyranoside (7)

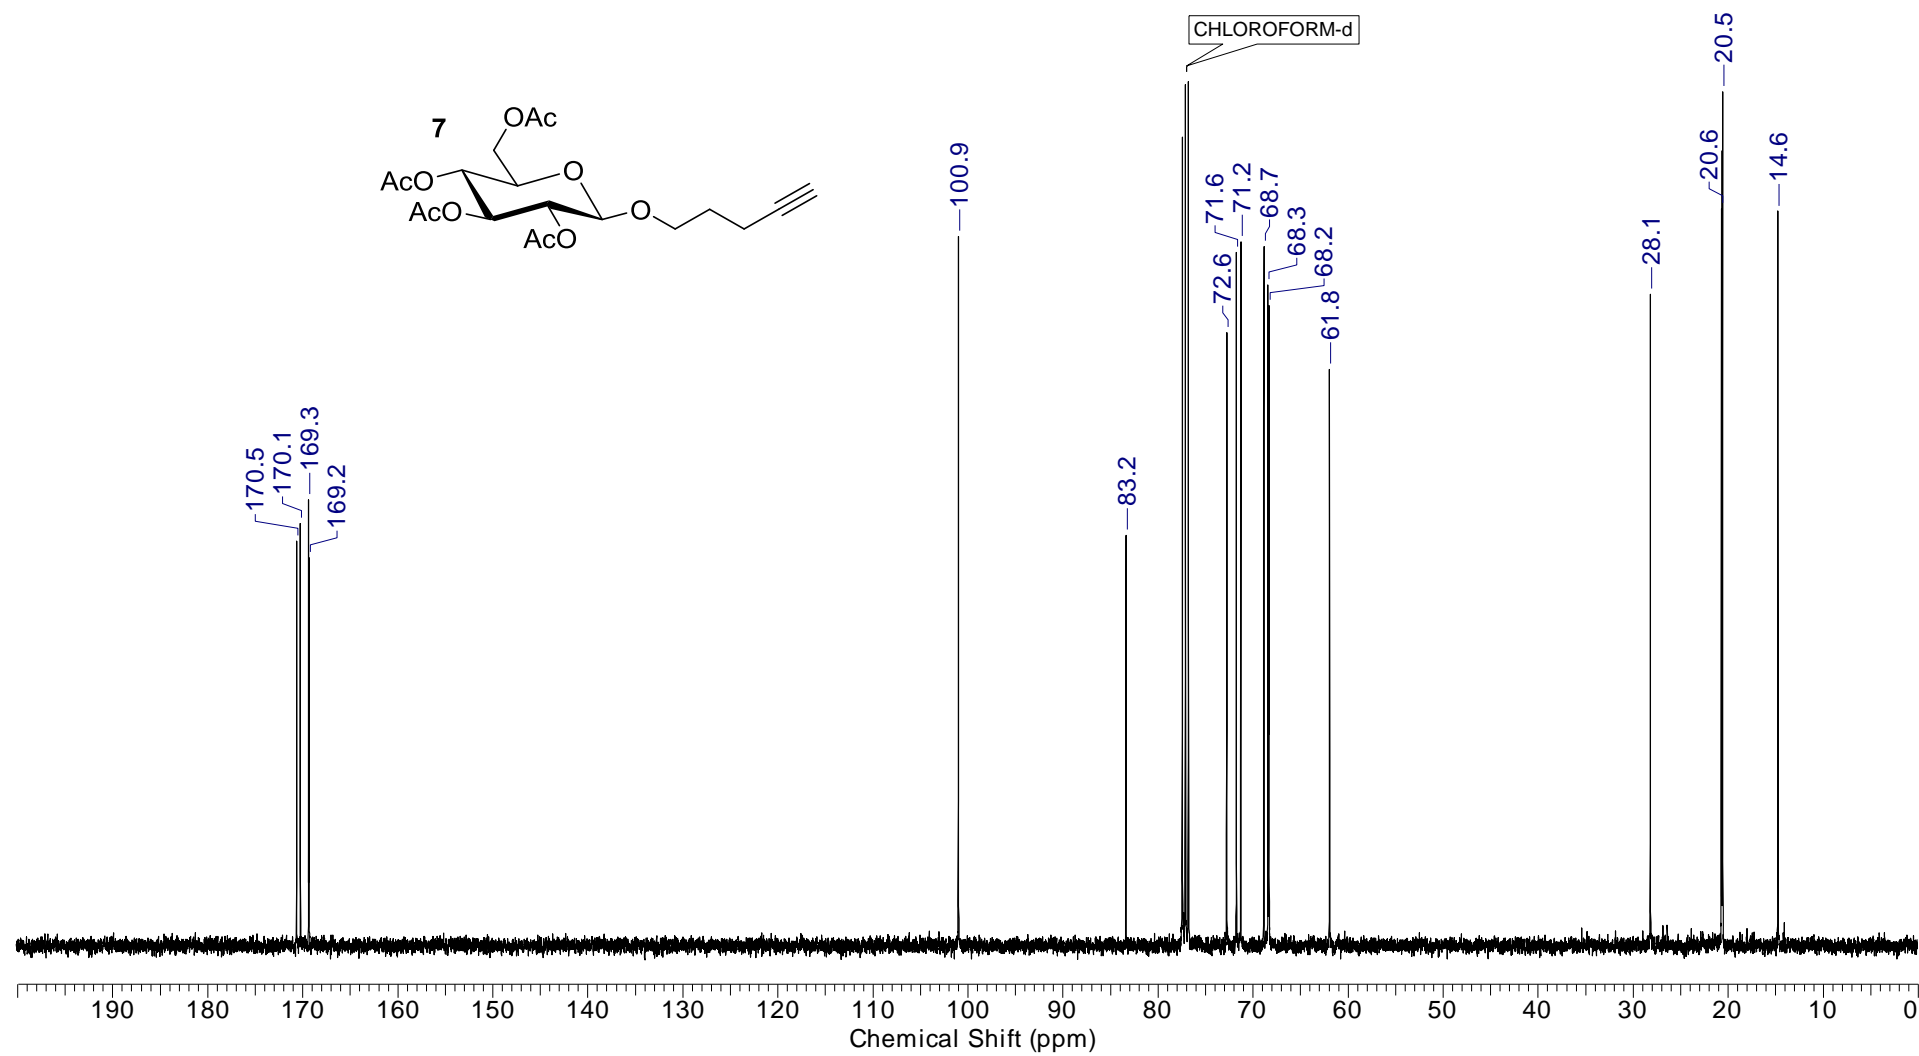

<sup>1</sup>H NMR spectrum of 2,3,4,6-tetra-*O*-acetyl-β-D-glucopyranosyl azide (8)

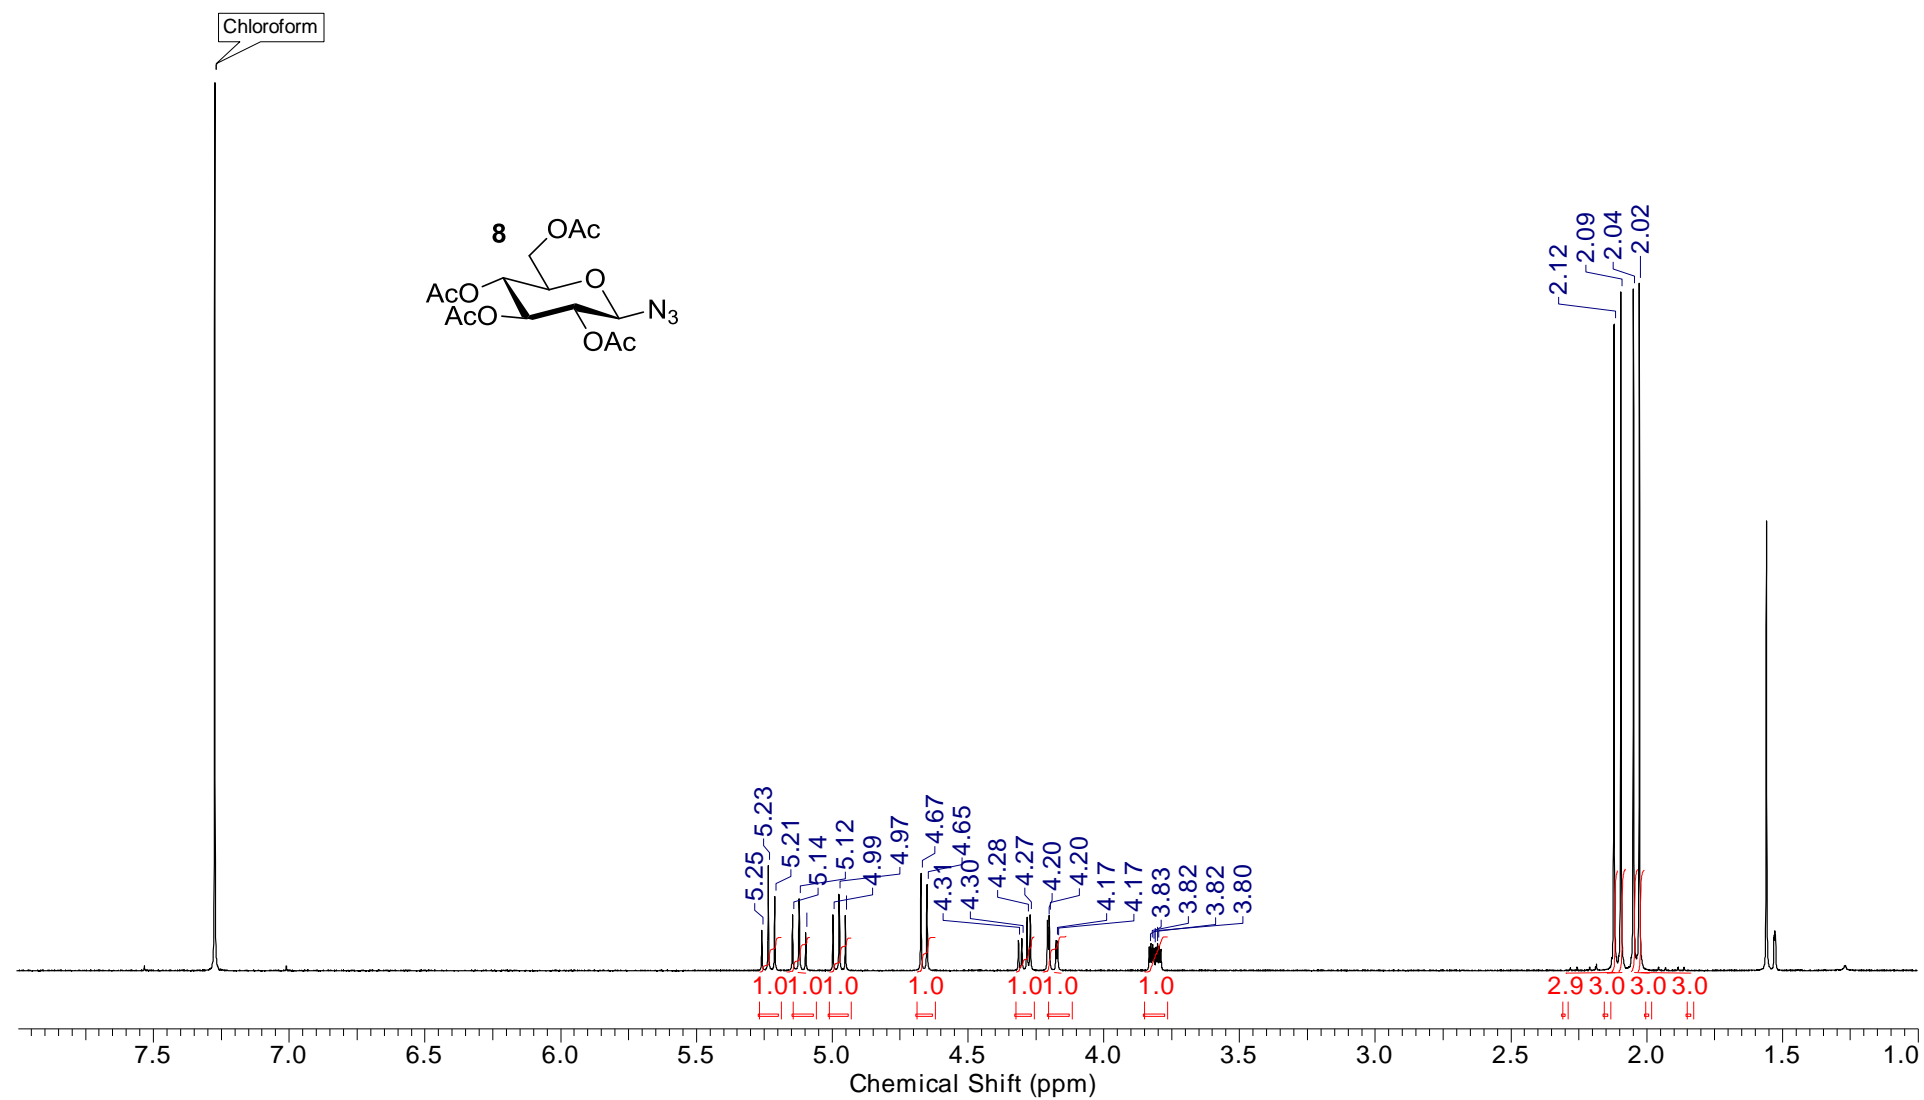

<sup>13</sup>C NMR spectrum of 2,3,4,6-tetra-*O*-acetyl-β-*D*-glucopyranosyl azide (8)

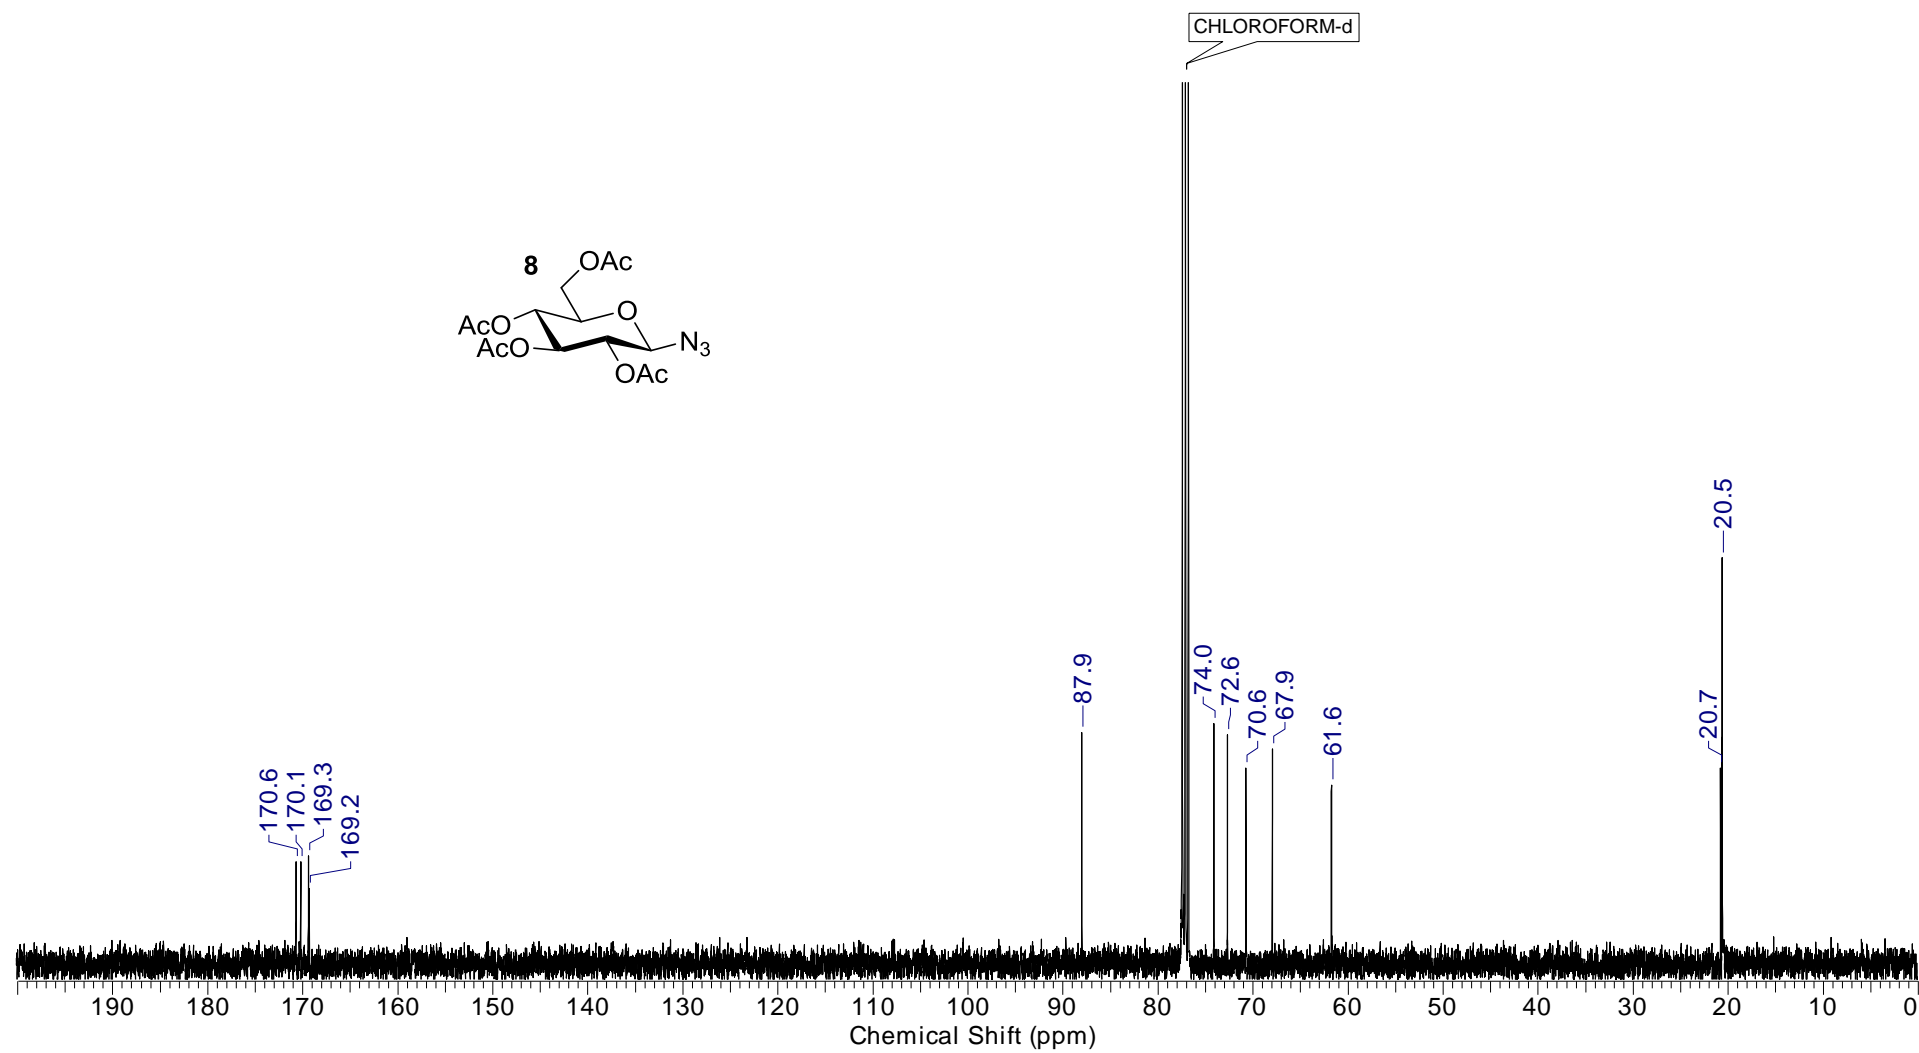

## References

- [1] Kartha, K. P. R.; Jennings, H. J. *J. Carbohydr. Chem.* **1990**, 9, 777–781.
- [2] Nóbrega, C.; Vázquez, J. T. *Tetrahedron: Asymmetry* **2003**, 14, 2793–2801.
- [3] Ikeda, K.; Morimoto, T.; Kakiuchi, K. *J. Org. Chem.* **2010**, 75, 6279–6282.
- [4] Pilgrim, W.; Murphy, P. V. *J. Org. Chem.* **2010**, 75, 6747–6755.
- [5] Ruchun, Y.; Haixin, D.; Yang, S.; Weihong, X.; Qiang, X.; Jun, W. *Lett. Org. Chem.* **2008**, 5, 518–521.
- [6] Gung, B. W.; Fox, R. M. *Tetrahedron* **2004**, 60, 9405–9415.
- [7] Neto, V.; Granet, R.; Krausz, P. *Tetrahedron* **2010**, 66, 4633–4646.
