# Supplementary figures and images for: Low-budget 3D-printed equipment for continuous flow reactions
Source: publisher site journal article supplement (doi:10.3762/bjoc.15.50), 2019-02-26

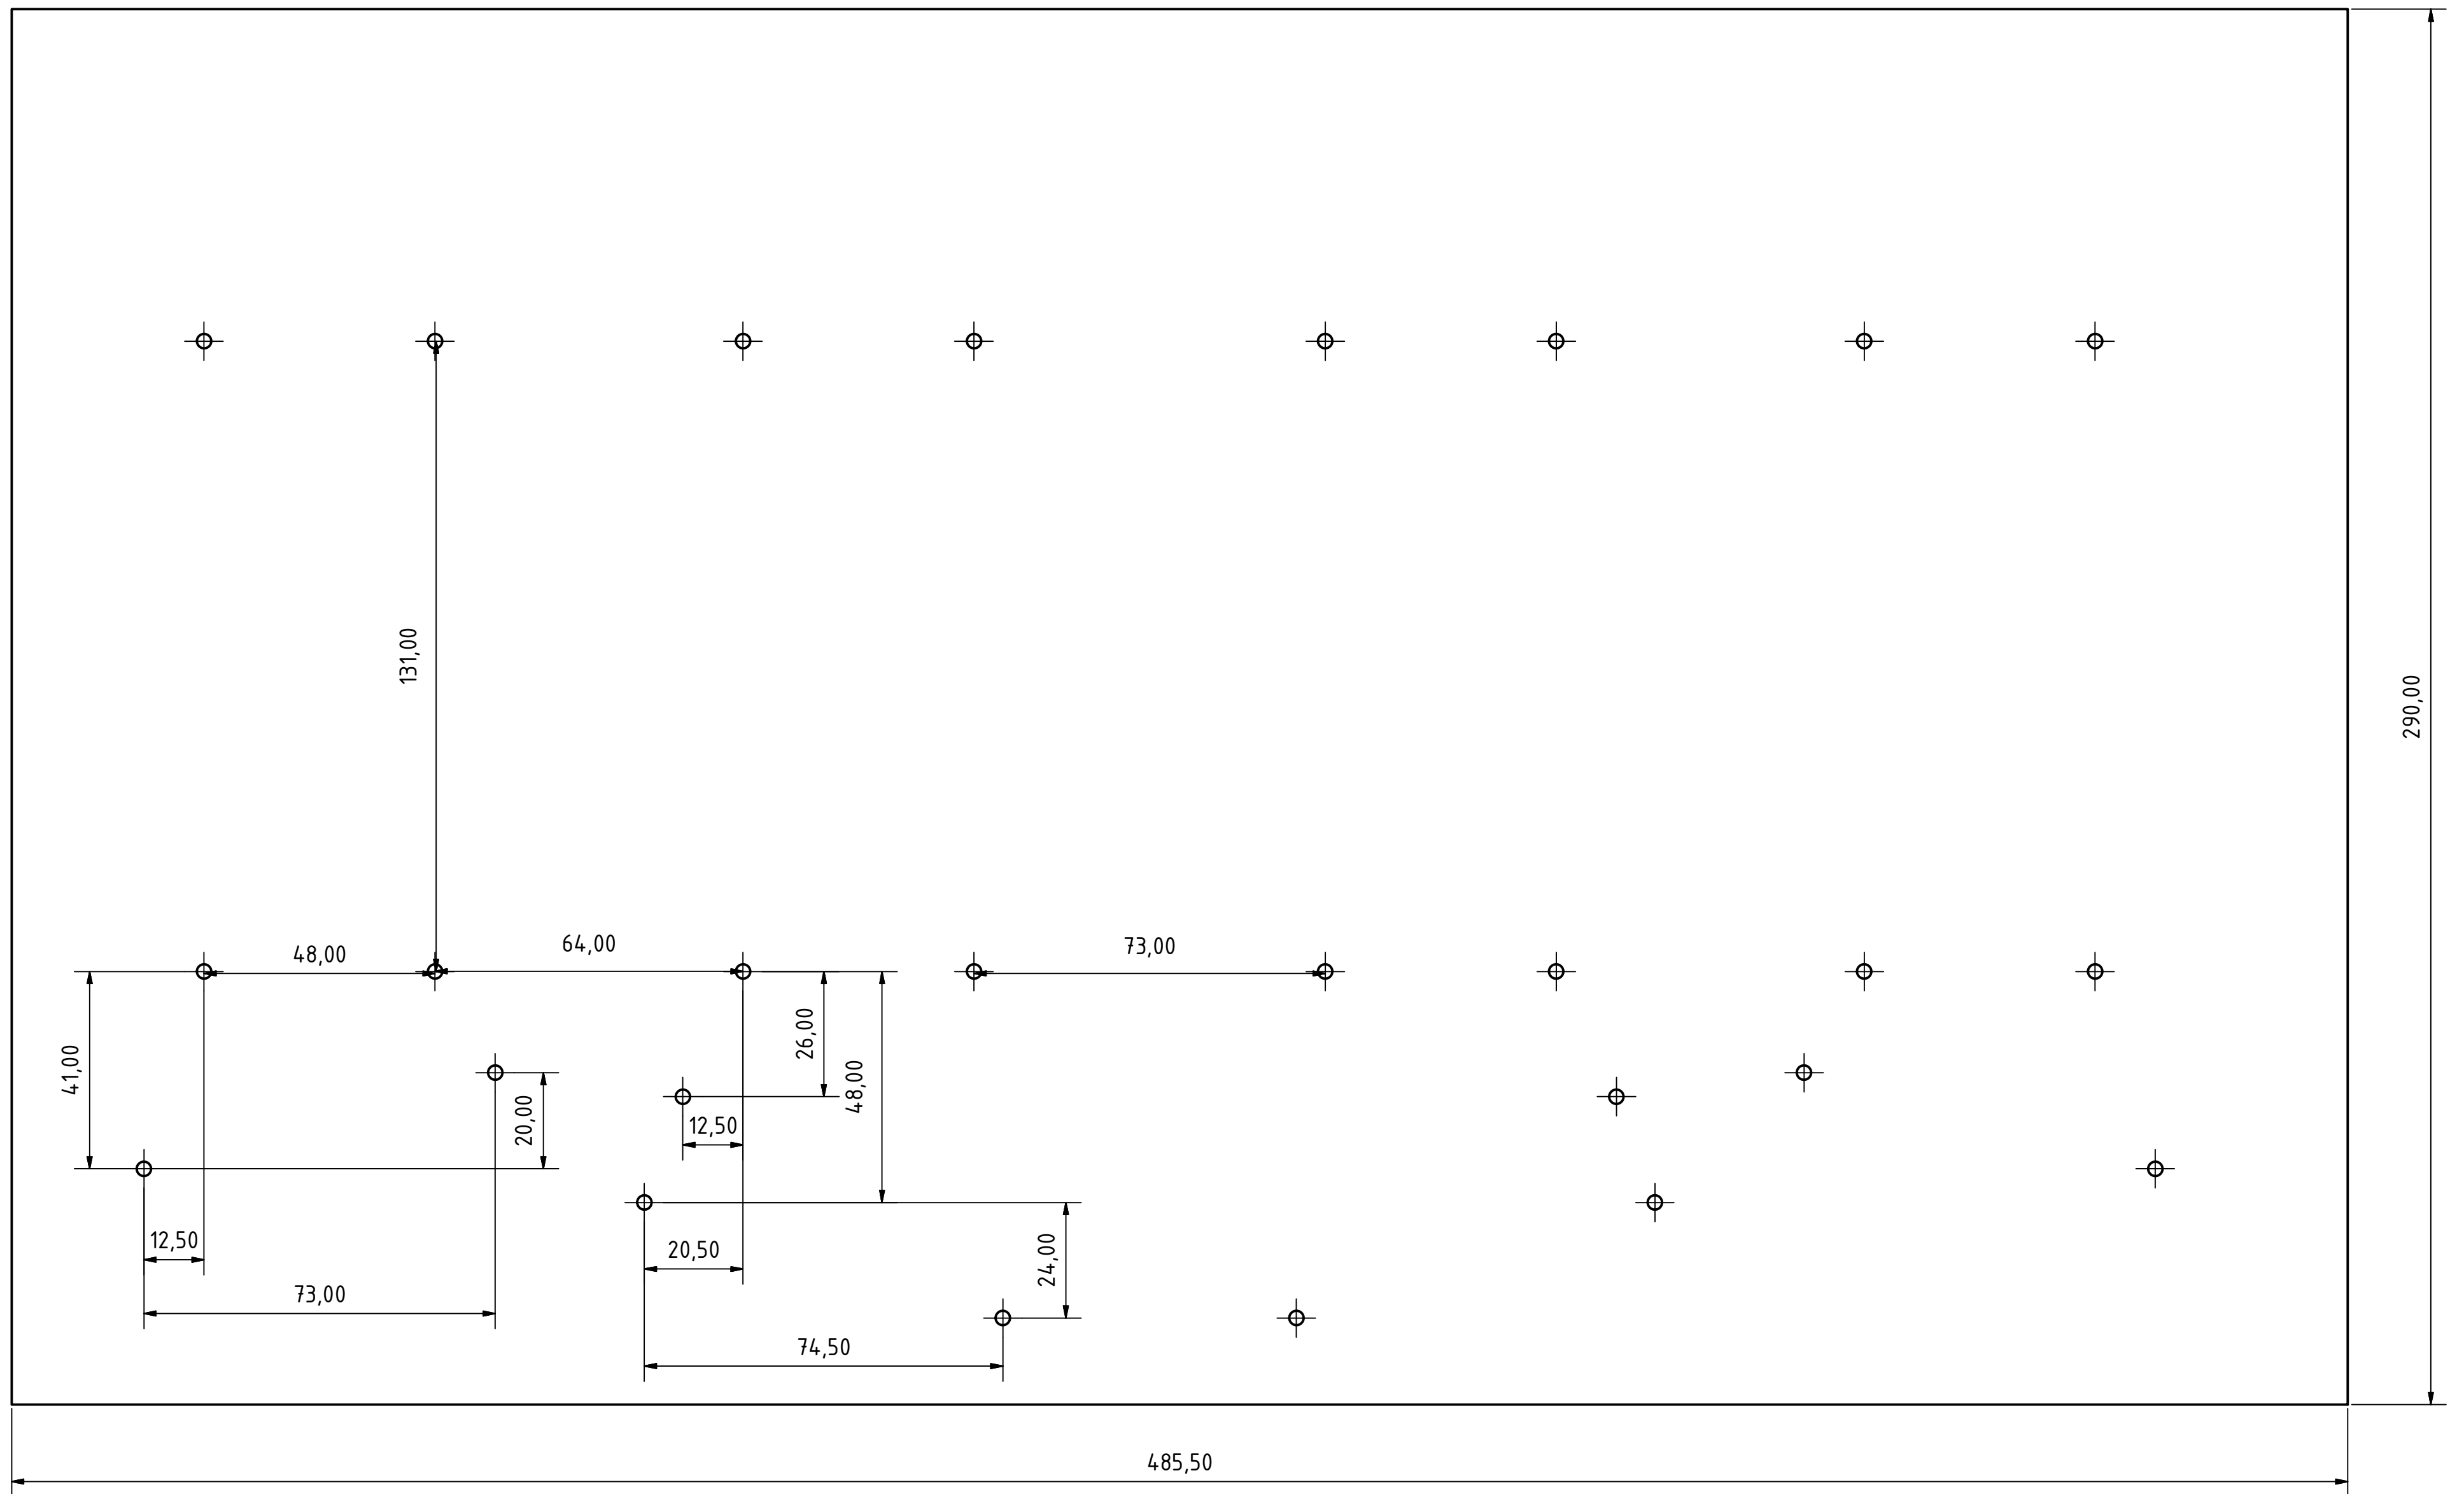

Supplement: Additional file 2 [file 1860-5397-15-50-S2.zip]
